# Supplementary material for: Integrating water exclusion theory into βcontacts to predict binding free energy changes and binding hot spots
Source: PubMed Central journal article supplement (PMC3941611; doi:10.1186/1471-2105-15-57), 2014-02-26
Supplement: 1471-2105-15-57-S1.pdf [file 1471-2105-15-57-S1.pdf]

# Prediction of binding free energy and binding hot spots by integrating water exclusion into $\beta$ atomic contacts — supplementary

Qian Liu<sup>1,2</sup>, Steven C.H. Hoi<sup>2</sup>, Chee Keong Kwoh<sup>2</sup>, Limsoon Wong<sup>3</sup> and Jinyan Li<sup>\*,1</sup>

<sup>1</sup>Advanced Analytics Institute and Center for Health Technologies, Faculty of Engineering and IT, University of Technology Sydney, Australia

<sup>2</sup>School of Computer Engineering, Nanyang Technological University, Singapore 639798

<sup>3</sup>School of Computing, National University of Singapore, Singapore 117417

Email: Qian Liu - qian.liu@uts.edu.au; Steven C.H. Hoi - chhoi@ntu.edu.sg; Chee Keong Kwoh - asckkwoh@ntu.edu.sg; Limsoon Wong - dcswls@nus.edu.sg; Jinyan Li - jinyan.li@uts.edu.au;

\*Corresponding author

## 1 An Analysis of $\beta$ Contacts Under Different $T_d$ s

$T_d$  has no significant impact on  $\beta$  contacts if large enough. For example, under  $\angle\beta = 75^\circ$  and in the 396 mutation residues (including backbone atoms), there are 32 involving  $\beta$  contacts whose distances are between 2.8 Å and 3.3 Å, 118  $\beta$  contacts with distances between 1.9 Å and 2.8 Å, and 5760  $\beta$  contacts whose distance less than 1.9 Å. Here, 1.9 Å is the radius of a water molecule plus 0.5 Å. The latter contacts with small distance predominate in  $\beta$  contacts.

## 2 Discussion of the evaluation

### 2.1 Statistical Significance of Difference Among Figure 2(a)-2(c)

Paired t-test in MATLAB is used to test the difference among Figure 2(a)-2(d) for the predictions of true hot spots. This test shows that the p-value of the difference of these predictions between Figure 2(a) and 2(b), between Figure 2(a) and 2(c), between Figure 2(a) and 2(d), and between Figure 2(b) and 2(c) are 0.016, 0.108, 0.010 and 0.798, respectively. Figure 2(a) of  $\beta$ ACV<sub>ASA</sub> predictions is more significantly different from the other figures, while Figure 2(b) of ACV<sub>ASA</sub> predictions and 2(c) of non $\beta$ ACV<sub>ASA</sub> predictions have insignificant difference.

## 2.2 Evaluation under leave-one-complex-out cross-validation

The performance of  $\beta\text{ACV}_{\text{ASA}}$  and  $\text{ACV}_{\text{ASA}}$  are also evaluated under the leave-one-complex-out cross-validation where those mutations in each of 22 protein-protein complexes are used for testing and other mutations for training. Under this evaluation strategy,  $\beta\text{ACV}_{\text{ASA}}$  has a F1 value 0.588 with a precision 0.595 and a recall 0.581, and  $\text{ACV}_{\text{ASA}}$  has a F1 value 0.454 with a precision 0.481 and a recall 0.430. This performance slightly decreases compared with the leave-one-out cross-validation. But the small performance decrease is insignificant, and all the conclusions above are still true using the performance of leave-one-complex-out cross-validation:  $\beta\text{ACV}_{\text{ASA}}$  is still superior to other methods to predict  $\Delta\Delta G$ . Meanwhile, the small performance decrease is reasonable because the number of mutations are not big and leave-one-complex-out cross-validation has less mutations in training process.

## 2.3 Discussion of using the 396 mutations

The benchmark dataset used by this work consists of 396 residues. However, under the definition of binding interfaces by FoldX, only 378 of them are interfacial residues. Therefore, FoldX could make only 378 predictions for alanine mutations. Similar situation happened to Robetta which made only 338 predictions for the same dataset of 396 residues (details shown in Supplementary Table 3). In fact, some of those residues not detected by FoldX or Robetta are actually in the rim of binding interfaces (rim mutations for short), and the other have close contacts with their partner proteins, such as the two mutations of Pro in position 306 of Chain B in 1A22 and Glu in position 80 of Chain M in 1DX5. Although these two mutation residues are not defined to be in binding interfaces by FoldX and/or Robetta, their smallest spatial distance are less than 6Å to the atoms in their partner proteins. These two mutations can also affect protein binding significantly: the alanine mutation of Pro has  $\Delta\Delta G$  3.31 kcal/mol, and the alanine mutation of Glu has  $\Delta\Delta G$  3.4 kcal/mol.

If these two residue mutations were considered to have a small predicted  $\Delta\Delta G$ , Robetta would have a lower regression performance. Nevertheless, only the detected mutations by FoldX and Robetta are used in their regression performance assessment. In the classification performance comparison, all 396 mutations are used, and all non-predicted mutations by every classifier are considered to have a small predicted  $\Delta\Delta G$ . This is fair to all of the classifiers.

### 3 Dataset from BID and the evaluation

The mutations from BID [1] are also used for independent data testing. Those mutations have no explicit  $\Delta\Delta G$  but with the class labels ‘Strong’, ‘Intermediate’, ‘Weak’, ‘Insignificant’ and so on. Often, the mutations with ‘Strong’ are considered as binding hot spots. In BID, we found 22 complexes. However, many of them are protein binding to a short sequence of peptides, such as with less than 20 residues in Chain E in 1CDL, B in 1DDM, X in 1dVA, C and D in 1EBP and D in 1JPP, and with less than 40 residues in A in 1DX5, and P in 1K4U. Protein-peptide binding complexes are not considered in this work, because they have different physicochemical properties. Meanwhile, some other complexes have very small interfaces (1IHB and 1KTZ) or have mutations in linear peptide structures (1G3I and 1UB4). They are also not considered because small interfaces have great effect on interfacial residues’ ASA. 1GL4 is also not used due to the big difference of the definition of binding hot spots between BID data and the work in [2]. Finally, only protein-protein complexes are used for testing, including 1ES7, 1FAK, 1FE8, 1FOE, 1JAT, 1MQ8, 1NFI, 1NUN and 2HHB. This dataset only has 37 mutations with 7 binding hot spots, called BID-propro.

Finally, the prediction results on BID are shown in Table 1. It can be seen from Table 1 that on the small BID dataset BID-propro,  $\beta ACV_{ASA}$  has F1 value 0.571, higher than FoldX’s F1 0.480 and Robetta’s F1 0.556.  $\beta ACV_{ASA}$  achieves better performance than the existing methods again, although the number of the binding hot spots is too small to have a significant evaluation. Table 1 also shows the prediction results on both protein-protein complexes and protein-peptide complexes in BID with two different binding hot spot definitions. If only the mutations with the label ‘Strong’ are considered as binding hot spots, FoldX has highest F1 value, while Robetta and  $\beta ACV_{ASA}$  have higher F1 values if the mutations with the label ‘Strong’ or ‘Intermediate’ are considered as binding hot spots. According the difference between the performances on BID-propro and BID, it seems that  $\beta ACV_{ASA}$  is better to be used to predict binding hot spots for protein-protein complexes than for protein-peptide complexes. This is partially due to that ASA used in  $\beta ACV_{ASA}$  affects the prediction performance, but ASA of interfacial residues in protein-protein complexes is different from that from protein-peptide complexes (interfacial residues of protein-peptide complexes might be more exposed than interfacial residues in protein-protein complexes). The reason is supported by the improved performance of  $\beta ACV$  on BID where ASA is not used.

Table 1: Predictions performance by different methods for protein complexes in BID.

| Data set   | True hot spot labels | F1    |         |                            |             |
|------------|----------------------|-------|---------|----------------------------|-------------|
|            |                      | FoldX | Robetta | $\beta$ ACV <sub>ASA</sub> | $\beta$ ACV |
| BID-propro | Strong               | 0.480 | 0.556   | 0.571                      | 0.533       |
| BID        | Strong               | 0.330 | 0.288   | 0.294                      | 0.318       |
| BID        | Strong, Intermediate | 0.562 | 0.627   | 0.626                      | 0.641       |

Table 2: The used dataset.

| PDB ID            | Biological Unit 1             |           |                   | Biological Unit 2                     |           |                   |
|-------------------|-------------------------------|-----------|-------------------|---------------------------------------|-----------|-------------------|
|                   | Chain Name(s)                 | mutations | $\geq 2$ kcal/mol | Chain Name(s)                         | mutations | $\geq 2$ kcal/mol |
| 1A22 <sup>1</sup> | growth hormone                |           |                   | growth hormone receptor               |           |                   |
|                   | A                             | 30        | 3                 | B                                     | 32        | 5                 |
| 1A4Y <sup>4</sup> | ribonuclease inhibitor        |           |                   | angiogenin                            |           |                   |
|                   | A                             | 13        | 2                 | B                                     | 11        | 1                 |
| 1AHW <sup>5</sup> | immunoglobulin fab 5g9        |           |                   | tissue factor                         |           |                   |
|                   | AB                            | 0         | 0                 | C                                     | 8         | 1                 |
| 1BRS              | barnase                       |           |                   | barstar                               |           |                   |
|                   | A                             | 7         | 6                 | D                                     | 5         | 3                 |
| 1BXI              | colicin e9 immunity           |           |                   | colicin e9                            |           |                   |
|                   | A                             | 17        | 7                 | B                                     | 0         | 0                 |
| 1CBW <sup>6</sup> | bovine chymotrypsin           |           |                   | BPTI                                  |           |                   |
|                   | GH                            | 0         | 0                 | I                                     | 8         | 0                 |
| 1DAN <sup>5</sup> | blood coagulation factor VIIA |           |                   | soluble tissue factor                 |           |                   |
|                   | HL                            | 25        | 0                 | TU                                    | 35        | 2                 |
| 1DFJ <sup>4</sup> | ribonuclease                  |           |                   | ribonuclease inhibitor                |           |                   |
|                   | E                             | 0         | 0                 | I                                     | 13        | 4                 |
| 1DVF <sup>3</sup> | FV D1.3                       |           |                   | FV E5.2                               |           |                   |
|                   | AB                            | 16        | 6                 | CD                                    | 8         | 3                 |
| 1DX5              | thrombomodulin                |           |                   | thrombin                              |           |                   |
|                   | I                             | 0         | 0                 | M                                     | 16        | 5                 |
| 1F47              | cell division protein ftsz    |           |                   | cell division protein zipa            |           |                   |
|                   | A                             | 9         | 3                 | B                                     | 0         | 0                 |
| 1FC2              | protein A                     |           |                   | immunoglobulin fc                     |           |                   |
|                   | C                             | 3         | 1                 | D                                     | 0         | 0                 |
| 1FCC              | IGG1 MO61 FC                  |           |                   | streptococcal protein G               |           |                   |
|                   | A                             | 0         | 0                 | C                                     | 8         | 4                 |
| 1GC1              | CD4                           |           |                   | envelope protein GP120                |           |                   |
|                   | C                             | 17        | 0                 | G                                     | 0         | 0                 |
| 1JCK              | T cell antigen receptor       |           |                   | staphylococcal enterotoxin C3         |           |                   |
|                   | A                             | 0         | 0                 | B                                     | 9         | 4                 |
| 1JRH              | antibody A6                   |           |                   | interferon-gamma receptor alpha chain |           |                   |
|                   | HL                            | 17        | 3                 | I                                     | 12        | 5                 |
| 1JTG              | beta-lactamase TEM            |           |                   | beta-lactamase inhibitory protein     |           |                   |
|                   | A                             | 6         | 0                 | B                                     | 4         | 2                 |
| 1NMB              | Fab NC10                      |           |                   | N9 neuraminidase                      |           |                   |
|                   | HL                            | 1         | 0                 | N                                     | 0         | 0                 |

Continued on next page

**Table 2 – continued from previous page**

| PDB ID              | Biological Unit 1    |           |                   | Biological Unit 2             |           |                   |
|---------------------|----------------------|-----------|-------------------|-------------------------------|-----------|-------------------|
|                     | Chain Name(s)        | mutations | $\geq 2$ kcal/mol | Chain Name(s)                 | mutations | $\geq 2$ kcal/mol |
| 1VFB <sup>2,3</sup> | IGG1-KAPPA D1.3 FV   |           |                   | hen egg white lysozyme        |           |                   |
|                     | AB                   | 14        | 2                 | C                             | 12        | 1                 |
| 2PTC <sup>6</sup>   | beta-trypsin         |           |                   | trypsin inhibitor             |           |                   |
|                     | E                    | 0         | 0                 | I                             | 2         | 2                 |
| 3HFM <sup>2</sup>   | Hyhel-10 IGG1        |           |                   | hen egg white lysozyme        |           |                   |
|                     | HL                   | 12        | 8                 | Y                             | 13        | 3                 |
| 3HHR <sup>1</sup>   | human growth hormone |           |                   | human growth hormone receptor |           |                   |
|                     | A                    | 10        | 0                 | BC                            | 3         | 0                 |

- <sup>1</sup>: These two complexes have identical protein sequences, but they have different alanine mutations. Please refer to Supplementary Table 2 for detail.
- <sup>2</sup>: Chain C in 1VFB and Chain Y in 3HFM are identical, but they have different binding sites in 1VFB and in 3HFM.
- <sup>3</sup>: Chain A and B in 1VFB and in 1DVF are identical, but their partner proteins Chain C in 1VFB and Chain C and D in 1DVF are dissimilar, indicating that 1VFB and 1DVF possess different interfaces in 3D structures.  $\Delta\Delta G$  of alanine mutations for the same specific residues in Chain A and B are almost different. In detail,  $\Delta\Delta G$  for the same mutations in Chain A are: His<sup>130</sup>:0.8(1.7), Tyr<sup>32</sup>:1.3(2), Tyr<sup>49</sup>:0.8(1.7), Tyr<sup>50</sup>:0.4(0.7), Trp<sup>92</sup>:1.71(0.3) and Ser<sup>93</sup>:0.11(1.2);  $\Delta\Delta G$  for the same mutations in Chain B are: Tyr<sup>32</sup>:0.5(1.8), Trp<sup>52</sup>:1.23(4.2), Asp<sup>54</sup>:1.95(4.3), Asp<sup>58</sup>:-0.2(1.6), Arg<sup>99</sup>:0.47(1.9), Asp<sup>100</sup>:3.1(2.8) and Tyr<sup>101</sup>:4(4); the numbers after ‘:’ are  $\Delta\Delta G$  in 1VFB, and the numbers in brackets are  $\Delta\Delta G$  in 1DVF.
- <sup>4</sup>: Chain B in 1A4Y has dissimilar sequence to Chain E in 1DFJ, and Chain A in 1A4Y is similar to Chain I in 1DFJ. The latter two similar sequences have several same mutations but with different  $\Delta\Delta G$  as follows: Trp<sup>261</sup>:0.1(2<sup>57</sup>:1.3), Trp<sup>263</sup>:1.2(2<sup>59</sup>:2.2), Ser<sup>289</sup>:0(2<sup>85</sup>:0.8), Trp<sup>318</sup>:1.5(3<sup>14</sup>:1), Lys<sup>320</sup>:-0.3(3<sup>16</sup>:1.3), Glu<sup>401</sup>:0.9(3<sup>97</sup>:1.3), Tyr<sup>434</sup>:3.3(4<sup>30</sup>:5.9), Asp<sup>435</sup>:3.5(4<sup>31</sup>:3.6), Tyr<sup>437</sup>:0.8(4<sup>33</sup>:2.6) and Ile<sup>459</sup>:0.7(4<sup>55</sup>:0.3). The numbers after ‘:’ are  $\Delta\Delta G$  in 1A4Y and those in brackets are  $\Delta\Delta G$  in 1DFJ.
- <sup>5</sup>: Chain T and U in 1DAN constitute Chain C in 1AHW, but Chain A and B in 1AHW have different sequences from Chain H and L in 1DAN. Chain C in 1AHW (Chain T and U in 1DAN) also has different binding sites in these two complexes.
- <sup>6</sup>: Chain I in 2PTC and in 1CBW are identical, but Chain E in 2PTC has 42% sequence identity to Chain G in 1CBW and 44% to Chain H in 1CBW. Further, Chain I in 2PTC only has two mutations: Lys<sup>15</sup> and Ile<sup>18</sup> which has  $\Delta\Delta G$  10 kcal/mol and 4.97 kcal/mol. In contrast, their mutations have much smaller  $\Delta\Delta G$  in 1CBW, i.e., 1.99 kcal/mol and 1.4 kcal/mol.

Table 3: Alanine mutations in the used dataset. ‘Inter’ denotes the interaction of two biological units split by ‘-’, and ‘C’ indicates protein chain names.  $^a$  and  $^{sc}$  represent the ASA change of all atoms from a residue or of side-chain atoms, while  $^{ad}$  and  $^m$  denote the surface distance  $d$  of those contacts of all atoms from a residue or of the mutated atoms;  $d$  is the Euclidian distance of two atoms minus the sum of their van der Waals radii as defined in [3];  $\surd$  or  $\bar{\surd}$  indicates an outlier prediction with predicted  $\Delta\Delta G$  less than -3 kcal/mol or more than 11 kcal/mol.

| PDB  | Inter | C | Pos | AA  | $\Delta\Delta G_{exp}$ | ASA <sup>a</sup> | ASA <sup>sc</sup> | d <sup>ad</sup> | d <sup>m</sup> | FoldX        | Robetta      | $\beta ACV_{ASA}$ | $\beta ACV_{ASA}^2$ |
|------|-------|---|-----|-----|------------------------|------------------|-------------------|-----------------|----------------|--------------|--------------|-------------------|---------------------|
| 1A22 | A-B   | A | 18  | HIS | -0.5                   | 71.67            | 71.66             | -0.47           | -0.47          | -0.220       | <b>2.290</b> | 0.402             | -0.420              |
|      | A-B   | A | 21  | HIS | 0.2                    | 31.11            | 31.11             | -0.15           | -0.15          | 0.190        | 0.830        | -0.284            | -0.756              |
|      | A-B   | A | 22  | GLN | -0.2                   | 16.35            | 15.83             | 0.13            | 0.40           | -0.060       | 0.050        | 0.372             | 0.410               |
|      | A-B   | A | 25  | PHE | -0.4                   | 47.89            | 47.89             | 0.12            | 0.12           | 0.920        | 1.290        | 1.005             | -0.861              |
|      | A-B   | A | 26  | ASP | -0.2                   | 0.00             | 0.00              | 2.93            | 2.93           | -0.040       | -            | 0.379             | 0.610               |
|      | A-B   | A | 42  | TYR | 0.2                    | 78.51            | 78.51             | -0.05           | -0.05          | 0.940        | <b>2.020</b> | 1.016             | 1.297               |
|      | A-B   | A | 45  | LEU | 1.2                    | 68.67            | 52.10             | -0.40           | 0.04           | 1.430        | 1.150        | 1.762             | 1.860               |
|      | A-B   | A | 46  | GLN | 0.1                    | 76.77            | 71.59             | -0.30           | -0.08          | -0.220       | 1.040        | 0.608             | 0.649               |
|      | A-B   | A | 48  | PRO | 0.4                    | 57.51            | 57.50             | -0.04           | -0.04          | 1.090        | -            | 0.485             | 1.433               |
|      | A-B   | A | 51  | SER | 0.3                    | 10.78            | 8.02              | 1.24            | 1.34           | -0.360       | -0.020       | 1.081             | 0.436               |
|      | A-B   | A | 56  | GLU | 0.4                    | 20.98            | 20.98             | -0.17           | -0.17          | 1.120        | 0.970        | <b>2.796</b>      | <b>3.076</b>        |
|      | A-B   | A | 61  | PRO | 1.2                    | 6.41             | 0.00              | 0.51            | 2.15           | 0.290        | -            | 0.409             | 0.686               |
|      | A-B   | A | 62  | SER | 0.1                    | 74.12            | 42.31             | -0.34           | 1.02           | 0.190        | -0.170       | 1.004             | 1.052               |
|      | A-B   | A | 63  | ASN | 0.3                    | 41.34            | 38.72             | 0.15            | 0.95           | 0.240        | 0.390        | 1.135             | 1.782               |
|      | A-B   | A | 64  | ARG | 1.6                    | 122.01           | 115.92            | -0.15           | -0.15          | 1.280        | <b>2.000</b> | 1.181             | 1.631               |
|      | A-B   | A | 65  | GLU | -0.5                   | 23.68            | 23.68             | 1.01            | 1.01           | 0.010        | -0.110       | -0.657            | -0.582              |
|      | A-B   | A | 66  | GLU | 0.43                   | 0.00             | 0.00              | 2.76            | 2.76           | 0.890        | -            | 0.851             | 0.991               |
|      | A-B   | A | 68  | GLN | 0.6                    | 37.83            | 37.83             | -0.07           | -0.07          | 1.620        | 1.810        | 1.684             | 1.403               |
|      | A-B   | A | 164 | TYR | 0.3                    | 22.41            | 22.41             | 1.14            | 1.14           | 1.780        | -            | <b>2.022</b>      | -0.745              |
|      | A-B   | A | 167 | ARG | 0.3                    | 34.74            | 34.74             | -0.01           | -0.01          | 1.190        | 0.420        | 1.724             | 1.331               |
|      | A-B   | A | 168 | LYS | -0.2                   | 50.24            | 49.83             | 0.10            | 0.10           | <b>2.090</b> | <b>2.120</b> | <b>4.543</b>      | <b>4.814</b>        |
|      | A-B   | A | 171 | ASP | 0.8                    | 58.04            | 57.55             | 0.14            | 0.14           | 1.490        | <b>9.000</b> | <b>4.044</b>      | <b>3.666</b>        |
|      | A-B   | A | 172 | LYS | <b>2</b>               | 30.23            | 30.23             | 0.21            | 0.21           | <b>2.540</b> | 0.740        | 1.227             | 1.490               |
|      | A-B   | A | 174 | GLU | -0.9                   | 11.59            | 11.59             | 0.60            | 0.60           | 1.790        | 1.380        | 1.057             | 0.362               |
|      | A-B   | A | 175 | THR | <b>2</b>               | 48.25            | 48.11             | -0.40           | -0.40          | <b>3.570</b> | <b>2.310</b> | <b>3.198</b>      | <b>2.812</b>        |
|      | A-B   | A | 176 | PHE | 1.9                    | 6.85             | 6.85              | 0.52            | 0.52           | 1.860        | -            | <b>2.174</b>      | <b>3.074</b>        |

Continued on next page

Table 3 – continued from previous page

| PDB | Inter | C   | Pos | AA          | $\Delta\Delta G_{exp}$ | ASA <sup>a</sup> | ASA <sup>sc</sup> | d <sup>ad</sup> | d <sup>m</sup> | FoldX        | Robetta         | $\beta ACV_{ASA}$ | $\beta ACV_{ASA}^2$ |
|-----|-------|-----|-----|-------------|------------------------|------------------|-------------------|-----------------|----------------|--------------|-----------------|-------------------|---------------------|
| A-B | A     | 178 | ARG | <b>2.4</b>  | 61.29                  | 61.29            | -0.07             | -0.07           | 1.900          | 0.380        | 1.307           | 0.957             |                     |
| A-B | A     | 179 | ILE | 0.8         | 22.30                  | 22.14            | 0.21              | 0.21            | <b>2.800</b>   | 1.000        | 1.557           | 0.589             |                     |
| A-B | A     | 182 | CYS | 1.01        | 32.49                  | 32.27            | -0.19             | -0.19           | 1.490          | -0.070       | 1.267           | 0.779             |                     |
| A-B | A     | 183 | ARG | 0.5         | 2.50                   | 2.50             | 2.32              | 2.32            | 1.960          | -            | -0.756          | -0.521            |                     |
| A-B | B     | 243 | ARG | <b>2.12</b> | 30.86                  | 30.48            | -0.40             | -0.40           | <b>5.930</b>   | <b>6.540</b> | <b>2.179</b>    | <b>2.179</b>      |                     |
| A-B | B     | 244 | GLU | 1.69        | 32.18                  | 32.18            | 0.01              | 0.01            | <b>2.050</b>   | 0.490        | 0.941           | 0.736             |                     |
| A-B | B     | 270 | ARG | 0.69        | 0.40                   | 0.40             | 2.31              | 2.31            | <b>2.120</b>   | -            | 0.099           | 0.043             |                     |
| A-B | B     | 271 | ARG | 0.54        | 75.59                  | 75.59            | -0.31             | -0.31           | <b>2.290</b>   | 1.310        | $\underline{y}$ | $\underline{y}$   |                     |
| A-B | B     | 274 | GLN | 0           | 30.70                  | 14.25            | 0.56              | 1.68            | <b>2.100</b>   | 0.030        | 0.143           | 0.200             |                     |
| A-B | B     | 275 | GLU | -0.1        | 21.98                  | 21.98            | 0.11              | 0.11            | 1.990          | 0.090        | -0.242          | 0.074             |                     |
| A-B | B     | 276 | TRP | 0.51        | 56.88                  | 56.87            | -0.40             | -0.40           | <b>5.220</b>   | <b>2.860</b> | <b>2.572</b>    | $\underline{y}$   |                     |
| A-B | B     | 280 | TRP | -0.02       | 3.85                   | 3.85             | 1.88              | 1.88            | <b>2.000</b>   | -            | -0.015          | 0.015             |                     |
| A-B | B     | 298 | SER | -0.05       | 22.82                  | 12.65            | 1.01              | 2.55            | <b>2.000</b>   | -            | 0.298           | 0.353             |                     |
| A-B | B     | 301 | THR | 1.76        | 12.52                  | 0.00             | 0.66              | 2.75            | -              | -            | 0.031           | -1.290            |                     |
| A-B | B     | 302 | SER | -0.2        | 24.90                  | 24.90            | 0.23              | 0.95            | 1.960          | -0.110       | 0.944           | 1.107             |                     |
| A-B | B     | 303 | ILE | 1.61        | 18.56                  | 7.78             | -0.34             | 0.36            | <b>2.860</b>   | 0.310        | <b>2.207</b>    | $\underline{y}$   |                     |
| A-B | B     | 304 | TRP | <b>4.5</b>  | 154.87                 | 135.22           | 0.10              | 0.15            | <b>5.960</b>   | <b>5.380</b> | <b>3.626</b>    | $\underline{y}$   |                     |
| A-B | B     | 305 | ILE | 1.94        | 13.13                  | 13.13            | 0.50              | 0.50            | <b>2.560</b>   | 0.130        | 1.020           | -1.275            |                     |
| A-B | B     | 306 | PRO | <b>3.31</b> | 36.26                  | 36.26            | 0.04              | 0.49            | <b>2.710</b>   | -            | <b>2.263</b>    | <b>3.022</b>      |                     |
| A-B | B     | 320 | GLU | -0.19       | 39.73                  | 31.76            | -0.00             | -0.00           | 1.910          | 0.670        | 0.726           | 0.691             |                     |
| A-B | B     | 321 | LYS | 0.08        | 16.18                  | 16.18            | 0.45              | 0.79            | <b>2.440</b>   | -            | 1.265           | 1.408             |                     |
| A-B | B     | 324 | SER | 0.28        | 11.38                  | 11.38            | 1.36              | 1.67            | <b>2.370</b>   | -0.060       | 0.485           | 1.073             |                     |
| A-B | B     | 326 | ASP | 0.99        | 14.49                  | 14.49            | 0.61              | 1.41            | <b>2.050</b>   | -0.310       | 1.446           | 1.220             |                     |
| A-B | B     | 327 | GLU | 0.97        | 63.40                  | 63.40            | -0.01             | -0.01           | 1.860          | 1.110        | 1.719           | 0.430             |                     |
| A-B | B     | 364 | ASP | 1.49        | 19.02                  | 19.02            | -0.15             | -0.15           | <b>5.770</b>   | 1.370        | 1.598           | 0.923             |                     |
| A-B | B     | 365 | ILE | <b>2.13</b> | 29.47                  | 17.32            | 0.44              | 1.30            | <b>2.750</b>   | 0.090        | 0.537           | 0.716             |                     |
| A-B | B     | 366 | GLN | 0.02        | 35.46                  | 17.83            | 0.50              | 2.12            | <b>2.800</b>   | 0.680        | 0.333           | 0.246             |                     |
| A-B | B     | 367 | LYS | -0.02       | 66.29                  | 35.17            | -0.11             | -0.11           | 1.780          | 0.220        | 0.462           | 0.732             |                     |
| A-B | B     | 369 | TRP | <b>4.5</b>  | 92.93                  | 91.27            | -0.05             | -0.05           | <b>6.670</b>   | <b>3.560</b> | <b>2.497</b>    | <b>4.597</b>      |                     |
| A-B | B     | 371 | VAL | -0.64       | 36.84                  | 36.84            | 0.17              | 0.17            | <b>2.910</b>   | 0.260        | 0.459           | -0.028            |                     |
| A-B | B     | 394 | THR | 0.2         | 0.00                   | 0.00             | 3.23              | 3.23            | -              | -            | -0.875          | -0.840            |                     |
| A-B | B     | 395 | THR | -0.09       | 4.77                   | 4.77             | 2.25              | 2.25            | <b>2.640</b>   | -            | -0.129          | -0.111            |                     |
| A-B | B     | 416 | GLN | 0.89        | 0.08                   | 0.07             | 2.75              | 2.75            | <b>2.840</b>   | -            | 0.092           | -0.582            |                     |
| A-B | B     | 417 | ARG | 0.28        | 47.44                  | 44.15            | -0.47             | -0.47           | <b>2.260</b>   | 0.230        | 0.451           | -0.296            |                     |

Continued on next page

Table 3 – continued from previous page

| PDB  | Inter | C | Pos | AA  | $\Delta\Delta G_{exp}$ | ASA <sup>a</sup> | ASA <sup>sc</sup> | d <sup>ad</sup> | d <sup>m</sup> | FoldX        | Robetta      | $\beta_{ACV_{ASA}}$ | $\beta_{ACV^2_{ASA}}$ |
|------|-------|---|-----|-----|------------------------|------------------|-------------------|-----------------|----------------|--------------|--------------|---------------------|-----------------------|
|      | A-B   | B | 418 | ASN | 0.3                    | 129.65           | 105.00            | -0.17           | -0.17          | 1.610        | 1.840        | 0.921               | 0.929                 |
|      | A-B   | B | 419 | SER | 0.03                   | 25.37            | 24.84             | 0.47            | 0.47           | <b>3.100</b> | 0.980        | 0.945               | 1.106                 |
| 1A4Y | A-B   | A | 261 | TRP | 0.1                    | 32.00            | 32.00             | 0.35            | 0.35           | 1.760        | 1.060        | 1.382               | -0.069                |
|      | A-B   | A | 263 | TRP | 1.2                    | 65.96            | 65.96             | -0.29           | -0.29          | <b>2.200</b> | <b>2.270</b> | <b>4.137</b>        | <b>9.377</b>          |
|      | A-B   | A | 289 | SER | 0                      | 7.54             | 7.54              | -0.05           | -0.05          | 1.760        | 0.600        | 1.291               | 0.627                 |
|      | A-B   | A | 318 | TRP | 1.5                    | 42.53            | 42.53             | -0.08           | -0.08          | <b>2.440</b> | <b>2.190</b> | 1.490               | <b>2.289</b>          |
|      | A-B   | A | 320 | LYS | -0.3                   | 39.47            | 39.47             | 0.12            | 0.12           | 1.760        | -0.210       | 0.793               | 1.001                 |
|      | A-B   | A | 344 | GLU | 0.2                    | 16.01            | 16.01             | 0.14            | 0.14           | 1.790        | 1.370        | 0.590               | 1.937                 |
|      | A-B   | A | 375 | TRP | 1                      | 56.59            | 56.59             | -0.35           | -0.35          | <b>2.820</b> | <b>2.830</b> | <b>2.684</b>        | 0.022                 |
|      | A-B   | A | 401 | GLU | 0.9                    | 19.59            | 19.59             | 0.44            | 0.44           | 1.760        | 0.020        | 0.565               | 0.352                 |
|      | A-B   | A | 434 | TYR | <b>3.3</b>             | 98.47            | 98.47             | 0.10            | 0.10           | <b>2.850</b> | <b>3.000</b> | <b>2.386</b>        | <b>3.957</b>          |
|      | A-B   | A | 435 | ASP | <b>3.5</b>             | 90.55            | 80.28             | -0.10           | -0.10          | <b>3.410</b> | 0.570        | <b>3.436</b>        | <b>3.239</b>          |
|      | A-B   | A | 437 | TYR | 0.8                    | 146.14           | 143.38            | 0.11            | 0.11           | <b>4.920</b> | <b>3.130</b> | <b>2.068</b>        | <b>2.028</b>          |
|      | A-B   | A | 457 | ARG | -0.2                   | 2.78             | 2.78              | 2.62            | 2.62           | 1.470        | -            | -0.664              | -0.506                |
|      | A-B   | A | 459 | ILE | 0.7                    | 23.86            | 23.86             | -0.38           | -0.38          | <b>2.270</b> | 0.620        | 0.937               | 1.656                 |
|      | A-B   | B | 5   | ARG | <b>2.3</b>             | 100.13           | 100.13            | -0.43           | -0.43          | <b>7.310</b> | <b>2.540</b> | 1.712               | 1.430                 |
|      | A-B   | B | 8   | HIS | 0.9                    | 24.05            | 24.05             | -0.23           | -0.23          | 1.960        | 0.850        | 0.882               | 0.875                 |
|      | A-B   | B | 12  | GLN | 0.3                    | 22.77            | 22.77             | -0.21           | -0.21          | <b>2.040</b> | 0.870        | <b>2.100</b>        | 1.803                 |
|      | A-B   | B | 13  | HIS | -0.3                   | 4.70             | 4.70              | 1.11            | 1.11           | <b>2.310</b> | -            | -1.476              | -0.737                |
|      | A-B   | B | 31  | ARG | 0.2                    | 125.12           | 119.92            | -0.58           | -0.58          | 1.760        | <b>2.760</b> | 1.830               | 1.885                 |
|      | A-B   | B | 32  | ARG | 0.9                    | 64.35            | 62.16             | -0.57           | -0.57          | <b>2.660</b> | 0.180        | 0.103               | 0.405                 |
|      | A-B   | B | 68  | ASN | 0.2                    | 10.66            | 10.67             | 0.64            | 0.64           | 1.740        | 0.520        | 1.337               | 1.065                 |
|      | A-B   | B | 84  | HIS | 0.2                    | 63.98            | 63.97             | 0.03            | 0.03           | -            | 1.050        | 1.030               | 1.201                 |
|      | A-B   | B | 89  | TRP | 0.2                    | 84.78            | 84.77             | -0.08           | -0.08          | <b>4.390</b> | <b>2.710</b> | 1.343               | 1.539                 |
|      | A-B   | B | 108 | GLU | -0.3                   | 43.90            | 43.90             | 0.29            | 0.29           | <b>3.820</b> | 1.730        | 1.500               | 1.502                 |
|      | A-B   | B | 114 | HIS | 0.65                   | 62.62            | 62.62             | 0.17            | 0.33           | 1.760        | 1.690        | 1.155               | 1.302                 |
| 1AHW | AB-C  | C | 156 | TYR | <b>4</b>               | 65.88            | 65.88             | -0.22           | -0.22          | <b>2.950</b> | <b>4.530</b> | <b>2.203</b>        | -2.288                |
|      | AB-C  | C | 157 | TYR | -1.9                   | 5.75             | 5.75              | 1.83            | 1.83           | 0.090        | -            | 1.441               | -0.417                |
|      | AB-C  | C | 167 | THR | 0                      | 70.63            | 41.50             | -0.23           | -0.20          | 0.440        | -0.240       | 1.710               | 0.044                 |
|      | AB-C  | C | 170 | THR | 1                      | 11.52            | 11.29             | 0.35            | 1.83           | -0.080       | -0.070       | 0.125               | 0.915                 |
|      | AB-C  | C | 178 | ASP | -0.5                   | 14.32            | 14.32             | 1.11            | 1.11           | -0.010       | -0.090       | 0.311               | 0.648                 |
|      | AB-C  | C | 197 | THR | 1.3                    | 22.21            | 8.87              | 0.80            | 1.46           | -            | -0.020       | -0.190              | -0.138                |
|      | AB-C  | C | 198 | VAL | -0.3                   | 25.99            | 7.15              | -0.35           | 1.64           | -0.010       | -0.010       | -0.226              | -0.087                |
|      | AB-C  | C | 199 | ASN | 1.1                    | 0.68             | 0.68              | 1.33            | 3.08           | -            | -            | -0.037              | -0.003                |

Continued on next page



Table 3 – continued from previous page

| PDB  | Inter | C   | Pos | AA          | $\Delta\Delta G_{exp}$ | ASA <sup>a</sup> | ASA <sup>sc</sup> | d <sup>ad</sup> | d <sup>m</sup> | FoldX        | Robetta      | $\beta_{ACV_{ASA}}$ | $\beta_{ACV_{ASA}^2}$ |
|------|-------|-----|-----|-------------|------------------------|------------------|-------------------|-----------------|----------------|--------------|--------------|---------------------|-----------------------|
| 1BRS | A-D   | A   | 27  | LYS         | <b>5.4</b>             | 56.69            | 56.69             | 0.05            | 0.05           | 1.590        | 1.880        | <b>2.947</b>        | <b>3.827</b>          |
|      | A-D   | A   | 58  | ASN         | <b>3.1</b>             | 1.85             | 1.69              | 0.47            | 2.28           | 1.590        | -            | 1.006               | 1.111                 |
|      | A-D   | A   | 59  | ARG         | <b>5.2</b>             | 159.13           | 147.78            | -0.18           | -0.18          | <b>2.050</b> | <b>3.010</b> | 1.516               | 1.080                 |
|      | A-D   | A   | 60  | GLU         | -0.2                   | 69.39            | 67.45             | -0.21           | -0.21          | 1.590        | 1.410        | 1.388               | 1.203                 |
|      | A-D   | A   | 73  | GLU         | <b>2.8</b>             | 10.14            | 10.14             | 1.69            | 1.69           | 1.590        | -            | 0.934               | -0.302                |
|      | A-D   | A   | 87  | ARG         | <b>5.5</b>             | 3.84             | 3.84              | -0.12           | -0.12          | <b>3.350</b> | <b>4.440</b> | <b>2.736</b>        | <b>3.460</b>          |
| A-D  | A     | 102 | HIS | <b>6</b>    | 107.74                 | 96.86            | -0.27             | -0.27           | -              | <b>5.080</b> | <b>4.587</b> | <b>5.036</b>        |                       |
| A-D  | D     | 29  | TYR | <b>3.4</b>  | 96.78                  | 86.59            | -0.15             | -0.15           | <b>2.470</b>   | <b>3.130</b> | 1.899        | <b>3.092</b>        |                       |
| A-D  | D     | 35  | ASP | <b>4.5</b>  | 115.75                 | 111.62           | -0.17             | -0.17           | 1.820          | 1.420        | 1.147        | 1.012               |                       |
| A-D  | D     | 39  | ASP | <b>7.7</b>  | 84.15                  | 84.06            | -0.55             | -0.55           | <b>6.490</b>   | <b>9.400</b> | <b>3.579</b> | <b>4.689</b>        |                       |
| A-D  | D     | 42  | THR | 1.8         | 39.91                  | 18.77            | 0.05              | 0.05            | <b>2.950</b>   | 1.660        | 1.868        | 1.326               |                       |
| A-D  | D     | 76  | GLU | 1.3         | 24.09                  | 24.10            | -0.18             | -0.18           | <b>2.670</b>   | 1.540        | 0.588        | 1.554               |                       |
| 1BXI | A-B   | A   | 23  | CYS         | 0.92                   | 38.11            | 10.61             | -0.10           | 0.08           | 0.370        | -0.080       | 1.454               | 1.923                 |
|      | A-B   | A   | 24  | ASN         | 0.14                   | 20.14            | 6.41              | 0.04            | 1.84           | 0.060        | 0.000        | 0.404               | 0.313                 |
|      | A-B   | A   | 27  | THR         | 0.73                   | 12.57            | 5.33              | 0.08            | 0.08           | 1.390        | 0.600        | 1.623               | 0.850                 |
| A-B  | A     | 29  | SER | 0.96        | 9.10                   | 6.56             | -0.05             | 2.87            | 0.020          | -            | -0.310       | 0.242               |                       |
| A-B  | A     | 30  | GLU | 1.41        | 106.09                 | 100.51           | -0.35             | -0.35           | 1.350          | <b>2.970</b> | <b>2.348</b> | 1.612               |                       |
| A-B  | A     | 33  | LEU | <b>3.42</b> | 33.40                  | 33.40            | 0.13              | 0.13            | 1.190          | 1.020        | 1.068        | <b>2.473</b>        |                       |
| A-B  | A     | 34  | VAL | <b>2.58</b> | 61.92                  | 61.50            | 0.33              | 0.33            | 1.220          | 0.980        | 0.838        | <b>2.032</b>        |                       |
| A-B  | A     | 37  | VAL | 1.66        | 16.20                  | 16.20            | -0.08             | -0.08           | 0.810          | 0.500        | 1.878        | <b>3.018</b>        |                       |
| A-B  | A     | 38  | THR | 0.9         | 19.24                  | 19.24            | 0.46              | 0.46            | 1.650          | 1.350        | 0.986        | 0.454               |                       |
| A-B  | A     | 41  | GLU | <b>2.08</b> | 32.84                  | 32.84            | -0.30             | -0.30           | 0.730          | -0.080       | <b>3.708</b> | <b>3.903</b>        |                       |
| A-B  | A     | 48  | SER | 0.01        | 9.38                   | 2.14             | -0.05             | 3.00            | 0.360          | -            | 0.341        | 0.257               |                       |
| A-B  | A     | 50  | SER | <b>2.19</b> | 35.71                  | 33.03            | -0.25             | -0.25           | 0.890          | <b>5.400</b> | 1.388        | 0.985               |                       |
| A-B  | A     | 51  | ASP | <b>5.92</b> | 36.70                  | 36.63            | -0.39             | -0.39           | <b>2.160</b>   | 0.820        | 1.701        | 0.973               |                       |
| A-B  | A     | 53  | ILE | 0.85        | 12.73                  | 2.21             | -0.49             | -0.15           | 0.750          | 0.170        | <b>2.218</b> | 0.953               |                       |
| A-B  | A     | 54  | TYR | <b>4.83</b> | 98.94                  | 80.73            | -0.25             | -0.25           | <b>3.250</b>   | <b>2.860</b> | 1.943        | <b>4.323</b>        |                       |
| A-B  | A     | 55  | TYR | <b>4.63</b> | 90.64                  | 90.63            | -0.25             | -0.25           | <b>3.600</b>   | <b>3.490</b> | 1.826        | 0.651               |                       |
| A-B  | A     | 56  | PRO | 1.24        | 5.40                   | 5.41             | 0.53              | 0.53            | 1.410          | -            | 1.256        | 1.589               |                       |
| 1CBW | GH-I  | I   | 11  | THR         | 0.22                   | 39.50            | 39.50             | 0.08            | 0.08           | 0.550        | 0.180        | 0.272               | -0.307                |
|      | GH-I  | I   | 13  | PRO         | -0.06                  | 59.11            | 47.88             | -0.10           | 0.62           | 0.610        | -            | 0.373               | 0.308                 |
|      | GH-I  | I   | 15  | LYS         | 1.99                   | 176.99           | 143.34            | -0.65           | -0.19          | 0.190        | 1.540        | <b>3.070</b>        | <b>3.960</b>          |
|      | GH-I  | I   | 17  | ARG         | 0.55                   | 171.37           | 146.39            | -0.42           | -0.42          | -0.010       | 1.820        | 1.267               | 1.501                 |
| GH-I | I     | 18  | ILE | 1.40        | 28.33                  | 28.33            | 1.04              | 1.17            | 1.100          | 0.730        | 0.603        | 1.308               |                       |

Continued on next page

Table 3 – continued from previous page

| PDB  | Inter | C | Pos  | AA  | $\Delta\Delta G_{exp}$ | ASA <sup>a</sup> | ASA <sup>sc</sup> | d <sup>ad</sup> | d <sup>m</sup> | FoldX        | Robetta      | $\beta_{ACV_{ASA}}$ | $\beta_{ACV_{ASA}^2}$ |
|------|-------|---|------|-----|------------------------|------------------|-------------------|-----------------|----------------|--------------|--------------|---------------------|-----------------------|
|      | GH-I  | I | 19   | ILE | 0.14                   | 28.17            | 27.90             | -0.23           | -0.23          | 0.730        | 0.540        | -0.943              | -0.903                |
|      | GH-I  | I | 34   | VAL | 0.05                   | 8.69             | 8.69              | 1.06            | 1.06           | 0.450        | 0.260        | 0.909               | 0.176                 |
|      | GH-I  | I | 39   | ARG | 0.22                   | 67.80            | 62.57             | 0.31            | 0.31           | 0.490        | 1.330        | 0.120               | -0.169                |
| 1DAN | HL-TU | H | 129B | ARG | 0                      | 1.34             | 1.33              | 2.63            | 2.63           | -            | -            | -0.619              | -0.867                |
|      | HL-TU | H | 129F | PHE | 0                      | 96.60            | 71.15             | 0.01            | 0.01           | -            | 1.660        | <b>2.372</b>        | -0.729                |
|      | HL-TU | H | 134  | ARG | 0.51                   | 126.88           | 120.63            | -0.20           | -0.20          | -0.770       | <b>3.090</b> | 1.891               | 1.662                 |
|      | HL-TU | H | 135  | PHE | 0                      | 26.38            | 25.83             | 0.59            | 0.59           | 0.380        | 0.530        | 0.597               | 0.573                 |
|      | HL-TU | H | 162  | ARG | 0.65                   | 4.26             | 2.85              | 1.74            | 1.74           | 0.340        | -            | 1.711               | <b>2.990</b>          |
|      | HL-TU | H | 164  | MET | 0.5                    | 111.85           | 110.80            | -0.17           | -0.17          | 1.160        | 1.030        | 1.552               | 0.975                 |
|      | HL-TU | H | 165  | THR | 0                      | 8.75             | 6.03              | -0.03           | 0.85           | 0.300        | 0.270        | 0.723               | 1.041                 |
|      | HL-TU | H | 166  | GLN | 0                      | 73.86            | 72.81             | -0.14           | -0.03          | 1.230        | <b>2.600</b> | 1.071               | 0.733                 |
|      | HL-TU | H | 167  | ASP | 0.41                   | 42.46            | 42.46             | -0.12           | -0.12          | 1.290        | 1.340        | <b>2.204</b>        | 1.176                 |
|      | HL-TU | H | 170A | GLN | 0                      | 0.00             | 0.00              | 2.76            | 2.76           | -            | -            | 0.014               | 0.270                 |
|      | HL-TU | H | 170  | GLN | 0                      | 4.96             | 4.96              | 1.66            | 1.66           | 0.670        | -            | 0.452               | 0.740                 |
|      | HL-TU | H | 230  | ARG | 0.51                   | 30.87            | 30.87             | -0.01           | -0.01          | 1.180        | 1.330        | 0.186               | -0.572                |
|      | HL-TU | L | 39   | LEU | 0                      | 107.16           | 103.32            | 0.01            | 0.01           | 0.960        | 1.240        | 0.464               | -0.288                |
|      | HL-TU | L | 42   | ILE | 0                      | 3.54             | 3.53              | 2.00            | 2.00           | 0.250        | 0.080        | 0.212               | 0.748                 |
|      | HL-TU | L | 62   | LYS | 0                      | 71.99            | 71.99             | -0.25           | -0.25          | -0.010       | -0.270       | 0.677               | 0.905                 |
|      | HL-TU | L | 64   | GLN | 0.8                    | 62.34            | 60.52             | -0.10           | -0.10          | 0.250        | <b>2.980</b> | 1.158               | 0.636                 |
|      | HL-TU | L | 69   | ILE | 1.9                    | 74.69            | 74.69             | -0.15           | -0.15          | 1.140        | 1.570        | 1.510               | <b>2.549</b>          |
|      | HL-TU | L | 71   | PHE | 1.2                    | 107.57           | 107.49            | -0.49           | -0.49          | <b>2.370</b> | <b>3.070</b> | 1.170               | 0.392                 |
|      | HL-TU | L | 73   | LEU | 0                      | 1.04             | 0.00              | -0.17           | 2.98           | 1.050        | -            | 0.162               | 0.190                 |
|      | HL-TU | L | 77   | GLU | 0                      | 60.26            | 60.26             | 0.09            | 0.09           | 0.280        | 0.360        | 1.236               | 1.591                 |
|      | HL-TU | L | 79   | ARG | 1.2                    | 119.07           | 110.44            | -0.31           | -0.31          | <b>2.060</b> | <b>2.450</b> | -0.388              | -0.227                |
|      | HL-TU | L | 88   | GLN | 0                      | 29.41            | 29.41             | 0.29            | 0.29           | 1.020        | 0.350        | 0.102               | -0.092                |
|      | HL-TU | L | 92   | VAL | 0                      | 79.29            | 65.59             | -0.10           | -0.10          | 1.990        | 1.050        | 0.625               | 0.332                 |
|      | HL-TU | L | 93   | ASN | 0                      | 29.29            | 29.28             | -0.24           | -0.10          | 1.360        | 0.120        | 0.867               | 0.368                 |
|      | HL-TU | L | 94   | GLU | 0                      | 39.69            | 38.31             | 0.51            | 0.51           | 0.800        | -            | 0.149               | 0.258                 |
|      | HL-TU | T | 15   | LYS | -0.4                   | 3.32             | 3.32              | 2.23            | 2.29           | 0.970        | -            | -0.420              | -0.158                |
|      | HL-TU | T | 17   | THR | 0.1                    | 28.20            | 25.69             | -0.15           | -0.15          | 1.130        | 0.130        | 0.372               | 0.250                 |
|      | HL-TU | T | 18   | ASN | 0.2                    | 11.27            | 11.27             | 0.50            | 0.97           | 1.090        | 0.040        | 0.916               | 1.048                 |
|      | HL-TU | T | 20   | LYS | <b>2.6</b>             | 75.90            | 75.89             | 0.05            | 0.05           | <b>2.810</b> | 1.500        | 1.714               | <b>2.736</b>          |
|      | HL-TU | T | 22   | ILE | 0.7                    | 27.72            | 27.72             | 0.24            | 0.24           | <b>2.640</b> | 0.650        | 1.182               | -0.595                |
|      | HL-TU | T | 24   | GLU | 0.7                    | 14.75            | 14.74             | -0.31           | -0.31          | <b>2.230</b> | 0.640        | 0.007               | 0.407                 |

Continued on next page

Table 3 – continued from previous page

| PDB  | Inter | C | Pos | AA  | $\Delta\Delta G_{exp}$ | ASA <sup>a</sup> | ASA <sup>sc</sup> | d <sup>ad</sup> | d <sup>m</sup> | FoldX        | Robetta      | $\beta ACV_{ASA}$ | $\beta ACV_{ASA}^2$ |
|------|-------|---|-----|-----|------------------------|------------------|-------------------|-----------------|----------------|--------------|--------------|-------------------|---------------------|
|      | HL-TU | T | 37  | GLN | 0.55                   | 27.30            | 27.30             | 0.14            | 0.14           | <b>3.370</b> | 1.410        | 1.758             | <b>2.220</b>        |
|      | HL-TU | T | 41  | LYS | 0.35                   | 22.37            | 3.21              | 0.39            | 2.87           | 1.420        | -            | -0.139            | 0.087               |
|      | HL-TU | T | 42  | SER | -0.1                   | 35.00            | 18.10             | 0.34            | 2.40           | 1.420        | -0.050       | -0.114            | -0.040              |
|      | HL-TU | T | 44  | ASP | 0.7                    | 51.16            | 51.16             | -0.18           | -0.18          | <b>2.520</b> | 0.890        | 1.016             | 1.071               |
|      | HL-TU | T | 45  | TRP | 1.6                    | 61.09            | 49.10             | 0.08            | 0.20           | 1.420        | 1.050        | 1.355             | $\bar{\lambda}$     |
|      | HL-TU | T | 46  | LYS | 0.25                   | 39.11            | 39.11             | 0.51            | 0.51           | 1.550        | -            | 0.574             | 0.594               |
|      | HL-TU | T | 47  | SER | 0.05                   | 26.81            | 22.94             | 0.31            | 0.83           | 1.160        | 0.600        | 0.842             | 0.407               |
|      | HL-TU | T | 48  | LYS | 0.4                    | 22.83            | 22.83             | 0.09            | 0.09           | 1.840        | 0.430        | 1.018             | 1.442               |
|      | HL-TU | T | 50  | PHE | 0.4                    | 101.62           | 101.18            | -0.24           | -0.24          | <b>4.060</b> | <b>2.610</b> | 1.229             | -0.395              |
|      | HL-TU | T | 51  | TYR | -0.1                   | 34.10            | 34.11             | 0.43            | 0.43           | <b>2.110</b> | -            | -0.365            | 0.523               |
|      | HL-TU | T | 58  | ASP | <b>2.18</b>            | 48.82            | 43.19             | -0.24           | -0.23          | <b>2.560</b> | 1.090        | <b>3.011</b>      | <b>2.302</b>        |
|      | HL-TU | T | 61  | ASP | 0.24                   | 50.59            | 50.26             | -0.16           | -0.16          | 0.640        | 0.010        | 0.713             | 0.688               |
|      | HL-TU | T | 62  | GLU | 0                      | 1.07             | 1.08              | 2.38            | 2.38           | 1.260        | -            | 1.263             | 1.866               |
|      | HL-TU | T | 72  | LEU | -0.06                  | 0.24             | 0.24              | 2.65            | 3.11           | 1.430        | -            | 0.591             | 0.148               |
|      | HL-TU | T | 76  | PHE | 1.2                    | 15.98            | 15.98             | 0.22            | 0.22           | 1.700        | 0.620        | <b>2.068</b>      | 1.469               |
|      | HL-TU | T | 78  | TYR | 0.7                    | 0.26             | 0.26              | 2.78            | 2.78           | 1.400        | -            | -0.133            | 1.281               |
|      | HL-TU | U | 94  | TYR | 1                      | 91.98            | 76.28             | -0.14           | -0.14          | <b>2.140</b> | <b>2.700</b> | 0.709             | 1.709               |
|      | HL-TU | U | 110 | GLN | 1.4                    | 69.94            | 62.32             | -0.17           | -0.17          | 0.750        | 1.690        | 0.675             | 0.209               |
|      | HL-TU | U | 128 | GLU | 0.1                    | 14.49            | 14.49             | 0.79            | 0.79           | 0.750        | -0.110       | 0.148             | 0.358               |
|      | HL-TU | U | 131 | ARG | 0                      | 66.22            | 59.92             | -0.49           | -0.49          | 0.750        | 0.280        | 0.438             | -0.091              |
|      | HL-TU | U | 132 | THR | 0                      | 1.04             | 0.00              | 0.25            | 3.05           | 0.750        | -            | 0.069             | -0.337              |
|      | HL-TU | U | 133 | LEU | 0                      | 41.56            | 41.56             | -0.05           | -0.05          | 1.320        | 1.620        | <b>2.187</b>      | <b>5.061</b>        |
|      | HL-TU | U | 135 | ARG | 0.55                   | 69.95            | 69.96             | -0.48           | -0.48          | 0.750        | 0.940        | 0.992             | 1.791               |
|      | HL-TU | U | 138 | ASN | 0                      | 18.61            | 15.84             | 1.61            | 1.61           | 0.750        | -            | -0.306            | -0.061              |
|      | HL-TU | U | 140 | PHE | 1.5                    | 23.34            | 23.33             | 0.42            | 0.42           | 0.910        | 1.540        | 1.072             | 1.393               |
|      | HL-TU | U | 163 | SER | 0                      | 28.06            | 24.60             | -0.36           | -0.36          | 0.750        | 0.420        | 0.232             | 0.005               |
|      | HL-TU | U | 203 | THR | 0.1                    | 25.60            | 25.61             | 0.19            | 0.19           | 0.750        | 0.220        | 0.757             | 0.594               |
|      | HL-TU | U | 207 | VAL | -0.2                   | 73.65            | 54.98             | 0.02            | 0.02           | 1.960        | 1.120        | 1.122             | -0.554              |
|      | HL-TU | U | 208 | GLU | 0                      | 25.82            | 25.82             | 0.33            | 0.33           | 0.750        | 0.280        | 0.111             | 0.376               |
| 1DFJ | E-I   | I | 202 | GLU | 1                      | 24.08            | 24.08             | 0.14            | 0.14           | -0.480       | 0.770        | 1.388             | 0.072               |
|      | E-I   | I | 257 | TRP | 1.3                    | 39.18            | 39.18             | 0.14            | 0.14           | 1.030        | 1.570        | <b>2.607</b>      | 0.254               |
|      | E-I   | I | 259 | TRP | <b>2.2</b>             | 43.45            | 43.45             | -0.02           | -0.02          | 0.910        | <b>3.090</b> | <b>2.788</b>      | <b>2.373</b>        |
|      | E-I   | I | 283 | GLU | 1.3                    | 23.90            | 23.90             | 0.01            | 0.01           | 0.290        | -0.100       | -0.307            | -0.188              |
|      | E-I   | I | 285 | SER | 0.8                    | 2.18             | 2.18              | 1.72            | 1.72           | 0.410        | 0.000        | 0.704             | -0.048              |

Continued on next page

Table 3 – continued from previous page

| PDB  | Inter | C | Pos  | AA  | $\Delta\Delta G_{exp}$ | ASA <sup>a</sup> | ASA <sup>sc</sup> | d <sup>ad</sup> | d <sup>m</sup> | FoldX        | Robetta      | $\beta_{ACV_{ASA}}$ | $\beta_{ACV^2_{ASA}}$ |
|------|-------|---|------|-----|------------------------|------------------|-------------------|-----------------|----------------|--------------|--------------|---------------------|-----------------------|
|      | E-I   | I | 314  | TRP | 1                      | 54.72            | 54.72             | 0.22            | 0.22           | 1.150        | 1.270        | 0.857               | 1.983                 |
|      | E-I   | I | 316  | LYS | 1.3                    | 42.17            | 42.17             | 0.32            | 0.32           | -0.150       | 0.380        | 0.355               | 0.570                 |
|      | E-I   | I | 397  | GLU | 1.3                    | 26.34            | 26.34             | -0.31           | -0.31          | -0.100       | 0.420        | 0.509               | 0.509                 |
|      | E-I   | I | 430  | TYR | <b>5.9</b>             | 107.72           | 107.72            | -0.11           | -0.11          | <b>3.750</b> | <b>2.720</b> | <b>2.247</b>        | <b>5.802</b>          |
|      | E-I   | I | 431  | ASP | <b>3.6</b>             | 77.71            | 62.73             | 0.36            | 0.36           | 0.090        | 0.160        | -0.126              | 0.121                 |
|      | E-I   | I | 433  | TYR | <b>2.6</b>             | 163.26           | 158.27            | -0.34           | -0.34          | <b>3.190</b> | <b>3.620</b> | <b>2.237</b>        | 1.940                 |
|      | E-I   | I | 453  | ARG | 0.8                    | 28.63            | 28.62             | -0.23           | -0.23          | 0.810        | 0.210        | -0.208              | -0.224                |
|      | E-I   | I | 455  | ILE | 0.3                    | 35.29            | 35.29             | 0.11            | 0.11           | <b>2.010</b> | 0.500        | 1.189               | 1.254                 |
| 1DVF | AB-CD | A | 30   | HIS | 1.7                    | 18.00            | 18.00             | 0.35            | 0.35           | 0.140        | 0.260        | 0.277               | 0.426                 |
|      | AB-CD | A | 32   | TYR | <b>2</b>               | 44.27            | 44.28             | 0.16            | 0.16           | 0.060        | 0.430        | <b>2.385</b>        | 1.193                 |
|      | AB-CD | A | 49   | TYR | 1.7                    | 23.07            | 23.07             | -0.23           | -0.23          | 1.040        | 0.870        | 1.476               | 0.670                 |
|      | AB-CD | A | 50   | TYR | 0.7                    | 53.01            | 53.01             | -0.12           | -0.12          | 0.060        | 0.550        | 1.014               | <b>2.055</b>          |
|      | AB-CD | A | 92   | TRP | 0.3                    | 74.62            | 55.78             | -0.20           | 0.01           | 0.470        | 1.550        | 1.834               | 0.216                 |
|      | AB-CD | A | 93   | SER | 1.2                    | 11.38            | 11.38             | 0.99            | 3.22           | 0.130        | -0.020       | -0.173              | -0.304                |
|      | AB-CD | B | 30   | THR | 0.9                    | 38.44            | 18.03             | -0.12           | 1.32           | -0.080       | 0.010        | 0.232               | 0.244                 |
|      | AB-CD | B | 32   | TYR | 1.8                    | 24.36            | 22.14             | 0.16            | 1.29           | 0.840        | 0.120        | 1.184               | 0.853                 |
|      | AB-CD | B | 52   | TRP | <b>4.2</b>             | 65.45            | 65.46             | -0.13           | -0.13          | <b>2.390</b> | <b>3.260</b> | <b>3.575</b>        | 1.540                 |
|      | AB-CD | B | 54   | ASP | <b>4.3</b>             | 68.05            | 65.23             | -0.24           | -0.24          | <b>2.130</b> | 0.480        | 1.953               | <b>2.479</b>          |
|      | AB-CD | B | 56   | ASN | 1.2                    | 53.22            | 53.22             | -0.29           | -0.15          | 0.890        | 1.060        | 0.735               | 1.287                 |
|      | AB-CD | B | 58   | ASP | 1.6                    | 14.14            | 14.14             | 0.14            | 0.14           | 1.270        | 0.710        | 1.012               | 1.234                 |
|      | AB-CD | B | 98   | GLU | <b>4.2</b>             | 10.64            | 7.42              | -0.26           | -0.26          | <b>2.930</b> | 1.150        | <b>5.462</b>        | <b>4.141</b>          |
|      | AB-CD | B | 99   | ARG | 1.9                    | 59.96            | 59.96             | 0.16            | 0.16           | -0.160       | 0.220        | 0.526               | 0.892                 |
|      | AB-CD | B | 100  | ASP | <b>2.8</b>             | 56.32            | 46.95             | 0.00            | 0.00           | -0.340       | 0.430        | 1.122               | 0.930                 |
|      | AB-CD | B | 101  | TYR | <b>4</b>               | 69.34            | 67.93             | -0.04           | -0.04          | 1.840        | <b>2.190</b> | <b>4.101</b>        | <b>5.855</b>          |
|      | AB-CD | C | 49   | TYR | 1.9                    | 15.95            | 15.95             | -0.24           | -0.24          | 1.640        | 0.040        | 0.479               | 0.530                 |
|      | AB-CD | D | 33   | HIS | 1.9                    | 26.99            | 26.99             | 0.00            | 0.00           | 0.650        | 0.790        | -0.203              | -0.131                |
|      | AB-CD | D | 52   | ASP | 1.7                    | 15.78            | 15.78             | 0.48            | 0.48           | 0.230        | -0.230       | 1.005               | 0.034                 |
|      | AB-CD | D | 54   | ASN | 1.9                    | 46.18            | 46.18             | -0.23           | -0.23          | 1.140        | <b>2.090</b> | 1.004               | 0.917                 |
|      | AB-CD | D | 97   | ILE | <b>2.7</b>             | 49.54            | 49.55             | -0.10           | -0.10          | 1.900        | 1.070        | 0.715               | 0.182                 |
|      | AB-CD | D | 98   | TYR | <b>4.7</b>             | 188.42           | 165.71            | -0.26           | -0.26          | <b>5.780</b> | <b>5.710</b> | <b>2.351</b>        | <b>4.645</b>          |
|      | AB-CD | D | 100B | ARG | <b>4.1</b>             | 92.07            | 92.07             | -0.20           | -0.20          | -            | 1.660        | <b>2.809</b>        | <b>2.605</b>          |
|      | AB-CD | D | 100  | GLN | 1.6                    | 96.01            | 90.58             | -0.29           | -0.29          | 1.540        | 1.440        | 0.959               | 0.730                 |
| 1DX5 | I-M   | M | 34   | PHE | <b>2.6</b>             | 15.87            | 15.87             | 0.32            | 0.32           | <b>3.400</b> | 1.010        | 1.088               | 0.981                 |
|      | I-M   | M | 36A  | SER | -0.2                   | 17.80            | 17.79             | -0.05           | -0.05          | -            | 0.570        | 0.477               | 0.523                 |

Continued on next page

Table 3 – continued from previous page

| PDB  | Inter | C   | Pos | AA          | $\Delta\Delta G_{exp}$ | ASA <sup>a</sup> | ASA <sup>sc</sup> | d <sup>ad</sup> | d <sup>m</sup> | FoldX        | Robetta      | $\beta_{ACV_{ASA}}$ | $\beta_{ACV^2_{ASA}}$ |
|------|-------|-----|-----|-------------|------------------------|------------------|-------------------|-----------------|----------------|--------------|--------------|---------------------|-----------------------|
| I-M  | M     | 37  | PRO | 1.2         | 53.02                  | 53.02            | 0.12              | 0.73            | <b>2.410</b>   | -            | 0.315        | 0.462               |                       |
| I-M  | M     | 38  | GLN | 1.4         | 116.04                 | 92.86            | -0.24             | -0.23           | <b>2.870</b>   | <b>2.310</b> | 1.804        | 1.454               |                       |
| I-M  | M     | 39  | GLU | -0.2        | 6.82                   | 6.82             | 2.00              | 2.39            | 1.610          | -0.090       | 0.511        | 0.622               |                       |
| I-M  | M     | 65  | LEU | 1           | 21.78                  | 21.78            | 0.49              | 0.49            | <b>2.060</b>   | -            | 0.890        | 1.725               |                       |
| I-M  | M     | 67  | ARG | <b>3.4</b>  | 14.96                  | 14.96            | -0.30             | -0.30           | <b>3.220</b>   | -0.010       | <b>6.244</b> | <b>6.003</b>        |                       |
| I-M  | M     | 74  | THR | 0.8         | 42.62                  | 22.45            | -0.23             | -0.23           | 1.610          | 0.200        | 0.272        | 0.236               |                       |
| I-M  | M     | 75  | ARG | 0.7         | 32.74                  | 32.74            | 0.05              | 0.13            | 1.900          | 0.050        | 0.044        | 0.478               |                       |
| I-M  | M     | 76  | TYR | <b>3</b>    | 87.26                  | 81.60            | -0.23             | -0.15           | <b>3.790</b>   | <b>2.030</b> | <b>2.617</b> | <b>3.018</b>        |                       |
| I-M  | M     | 77A | ARG | 1.5         | 86.70                  | 86.70            | -0.25             | -0.25           | -              | <b>2.070</b> | 1.006        | 0.365               |                       |
| I-M  | M     | 80  | GLU | <b>3.4</b>  | 2.26                   | 0.00             | 1.52              | 1.52            | 1.610          | -            | <b>3.078</b> | <b>3.294</b>        |                       |
| I-M  | M     | 81  | LYS | 1           | 44.74                  | 44.74            | 0.32              | 0.42            | <b>2.890</b>   | 0.800        | 1.105        | 1.600               |                       |
| I-M  | M     | 82  | ILE | <b>2.6</b>  | 71.53                  | 47.74            | -0.22             | 0.15            | <b>3.690</b>   | 1.070        | 1.848        | <b>2.790</b>        |                       |
| I-M  | M     | 84  | MET | 0.3         | 54.10                  | 54.10            | -0.14             | -0.14           | <b>3.060</b>   | 0.770        | 0.498        | 0.898               |                       |
| I-M  | M     | 110 | LYS | 0           | 52.26                  | 52.27            | 0.18              | 0.18            | 1.910          | 0.170        | 0.434        | 0.544               |                       |
| 1F47 | A-B   | A   | ASP | 0.7         | 56.93                  | 32.43            | -0.26             | 0.07            | 0.110          | -0.150       | 0.508        | 0.877               |                       |
| A-B  | A     | 5   | TYR | 0.88        | 105.84                 | 96.36            | -0.31             | -0.31           | 0.620          | 1.650        | 0.820        | 1.050               |                       |
| A-B  | A     | 6   | LEU | 0.94        | 96.95                  | 89.61            | -0.21             | -0.01           | 1.440          | 1.940        | 1.360        | <b>2.096</b>        |                       |
| A-B  | A     | 7   | ASP | 1.76        | 15.11                  | 12.44            | 0.91              | 1.82            | 0.280          | -            | -0.340       | -0.610              |                       |
| A-B  | A     | 8   | ILE | <b>2.56</b> | 85.67                  | 85.67            | 0.08              | 0.08            | <b>2.760</b>   | <b>2.070</b> | 1.129        | <b>2.451</b>        |                       |
| A-B  | A     | 9   | PRO | -0.06       | 4.74                   | 4.74             | 1.80              | 1.80            | 0.230          | -            | 0.222        | -0.031              |                       |
| A-B  | A     | 11  | PHE | <b>2.49</b> | 91.36                  | 90.43            | -0.27             | -0.27           | <b>3.180</b>   | <b>2.430</b> | 1.813        | <b>2.142</b>        |                       |
| A-B  | A     | 12  | LEU | <b>2.33</b> | 67.29                  | 67.29            | 0.08              | 0.08            | 1.650          | 1.180        | 1.108        | 1.623               |                       |
| A-B  | A     | 15  | GLN | -0.05       | 55.53                  | 55.21            | -0.80             | -0.56           | -0.340         | 0.040        | 0.828        | 0.683               |                       |
| 1FC2 | C-D   | C   | ASN | 0.6         | 47.72                  | 46.00            | -0.30             | -0.30           | 0.880          | 0.290        | 0.483        | 0.468               |                       |
| C-D  | C     | 150 | ILE | <b>2.2</b>  | 26.04                  | 25.51            | 0.27              | 0.27            | 0.450          | 0.810        | 1.519        | 0.642               |                       |
| C-D  | C     | 154 | LYS | 1.2         | 59.74                  | 59.74            | 0.12              | 0.12            | -0.310         | 0.180        | 1.043        | 0.594               |                       |
| A-C  | C     | 25  | THR | 0.24        | 27.59                  | 27.59            | 1.10              | 1.10            | -0.020         | 0.100        | 0.664        | 0.581               |                       |
| A-C  | C     | 27  | GLU | <b>4.9</b>  | 59.61                  | 59.61            | -0.56             | -0.56           | <b>4.060</b>   | <b>3.140</b> | <b>3.872</b> | <b>3.590</b>        |                       |
| A-C  | C     | 28  | LYS | 1.3         | 141.49                 | 134.63           | -0.21             | -0.21           | 0.390          | 0.990        | 1.451        | 1.782               |                       |
| A-C  | C     | 31  | LYS | <b>3.5</b>  | 73.61                  | 72.13            | -0.21             | -0.21           | 0.290          | 1.910        | <b>3.865</b> | <b>4.237</b>        |                       |
| A-C  | C     | 35  | ASN | <b>2.4</b>  | 80.44                  | 80.44            | -0.61             | -0.61           | -1.620         | 1.180        | <b>2.048</b> | <b>2.426</b>        |                       |
| A-C  | C     | 40  | ASP | 0.3         | 41.07                  | 41.06            | 0.10              | 0.10            | -0.310         | -0.150       | 0.294        | 0.797               |                       |
| A-C  | C     | 42  | GLU | 0.4         | 38.85                  | 38.85            | -0.37             | -0.37           | -0.490         | 0.030        | 0.141        | 0.725               |                       |
| A-C  | C     | 43  | TRP | <b>3.8</b>  | 55.53                  | 30.91            | -0.26             | -0.24           | 1.250          | <b>2.710</b> | <b>2.033</b> | <b>8.300</b>        |                       |

Continued on next page

Table 3 – continued from previous page

| PDB  | Inter | C   | Pos | AA         | $\Delta\Delta G_{exp}$ | ASA <sup>a</sup> | ASA <sup>sc</sup> | d <sup>ad</sup> | d <sup>m</sup> | FoldX        | Robetta      | $\beta_{ACV_{ASA}}$ | $\beta_{ACV_{ASA}^2}$ |
|------|-------|-----|-----|------------|------------------------|------------------|-------------------|-----------------|----------------|--------------|--------------|---------------------|-----------------------|
| 1GCI | C-G   | C   | 23  | SER        | 0.29                   | 4.22             | 4.22              | 1.42            | 1.42           | 0.290        | -            | 0.509               | 0.656                 |
|      | C-G   | C   | 25  | GLN        | 0.03                   | 20.08            | 20.08             | -0.01           | -0.01          | 0.030        | 0.420        | 0.176               | 0.942                 |
|      | C-G   | C   | 27  | HIS        | 0.28                   | 38.62            | 38.62             | -0.39           | -0.39          | 1.010        | 0.800        | 0.323               | 0.527                 |
|      | C-G   | C   | 29  | LYS        | 0.59                   | 24.95            | 24.95             | -0.24           | -0.24          | <b>2.430</b> | <b>2.460</b> | 1.462               | 1.484                 |
|      | C-G   | C   | 32  | ASN        | 0.18                   | 15.44            | 3.01              | -0.18           | 2.44           | 0.540        | 0.000        | 0.211               | 0.233                 |
|      | C-G   | C   | 33  | GLN        | 0.1                    | 28.86            | 17.33             | -0.34           | 1.38           | 0.690        | 0.030        | 0.703               | 0.726                 |
|      | C-G   | C   | 35  | LYS        | 0.32                   | 84.45            | 83.89             | -0.28           | -0.28          | -0.210       | 0.550        | 1.459               | 0.968                 |
|      | C-G   | C   | 40  | GLN        | -0.41                  | 87.86            | 78.97             | -0.16           | 0.03           | -0.700       | 1.660        | 0.622               | 0.138                 |
|      | C-G   | C   | 42  | SER        | 0                      | 75.02            | 67.54             | -0.14           | -0.12          | -0.800       | 0.030        | 1.237               | 0.393                 |
|      | C-G   | C   | 44  | LEU        | 1.04                   | 29.13            | 7.83              | 0.23            | 1.40           | 0.690        | 0.070        | 0.463               | -0.835                |
| 1JCK | C-G   | C   | 45  | THR        | -0.15                  | 23.68            | 23.69             | 0.05            | 0.05           | 0.750        | 0.320        | 1.273               | 1.314                 |
|      | C-G   | C   | 52  | ASN        | 0.7                    | 23.31            | 23.31             | -0.08           | -0.08          | 0.640        | 1.010        | 1.349               | 1.325                 |
|      | C-G   | C   | 59  | ARG        | 1.16                   | 56.12            | 47.19             | -0.57           | -0.57          | 1.440        | 1.020        | 1.302               | 0.237                 |
|      | C-G   | C   | 60  | SER        | -0.09                  | 54.63            | 39.70             | -0.38           | 1.26           | -            | 0.140        | 0.476               | 0.254                 |
|      | C-G   | C   | 63  | ASP        | -0.32                  | 36.61            | 36.61             | 1.05            | 1.05           | 0.070        | -0.050       | 0.719               | 0.582                 |
|      | C-G   | C   | 64  | GLN        | 0.44                   | 29.57            | 29.56             | 0.31            | 0.31           | 0.680        | 1.020        | 0.267               | 0.402                 |
|      | C-G   | C   | 85  | GLU        | 1.31                   | 1.77             | 1.77              | 1.30            | 1.30           | 0.770        | -            | -0.114              | 0.415                 |
|      | A-B   | B   | 20  | THR        | 1.4                    | 59.98            | 59.68             | 0.03            | 0.03           | -0.370       | 1.260        | 1.075               | 0.317                 |
|      | A-B   | B   | 23  | ASN        | <b>2.5</b>             | 49.05            | 49.05             | -0.38           | -0.38          | -1.120       | 1.960        | <b>2.483</b>        | <b>2.346</b>          |
|      | A-B   | B   | 26  | TYR        | 1.7                    | 38.74            | 38.73             | -0.33           | -0.33          | 0.260        | 0.920        | 1.604               | 1.888                 |
| A-B  | B     | 60  | ASN | 1.3        | 42.33                  | 42.33            | 0.29              | 0.29            | -0.370         | 0.820        | 1.160        | 0.691               |                       |
| A-B  | B     | 90  | TYR | <b>2.5</b> | 32.16                  | 31.73            | -0.17             | -0.13           | 0.710          | 1.000        | 1.012        | $\wedge$            |                       |
| A-B  | B     | 91  | VAL | <b>2.1</b> | 71.86                  | 71.68            | -0.16             | -0.16           | 0.220          | 1.040        | 0.590        | -2.089              |                       |
| A-B  | B     | 103 | LYS | 0.4        | 35.30                  | 19.12            | -0.54             | 1.44            | -0.170         | -0.260       | <b>2.121</b> | <b>2.663</b>        |                       |
| A-B  | B     | 176 | PHE | 1.9        | 44.52                  | 44.52            | 0.27              | 0.27            | -0.270         | 0.630        | -0.126       | 0.627               |                       |
| A-B  | B     | 210 | GLN | <b>2.5</b> | 14.05                  | 14.05            | -0.30             | -0.30           | -0.140         | 1.120        | 1.550        | <b>2.431</b>        |                       |
| 1JRH | HL-I  | H   | 32  | TYR        | 1.4                    | 60.47            | 60.48             | 0.10            | 0.10           | <b>2.090</b> | 1.630        | 0.874               | 1.295                 |
|      | HL-I  | H   | 52  | TRP        | <b>2.7</b>             | 18.74            | 18.74             | 0.17            | 0.17           | 1.310        | 1.550        | <b>5.463</b>        | <b>3.700</b>          |
|      | HL-I  | H   | 53  | TRP        | <b>2.4</b>             | 27.95            | 27.96             | -0.13           | -0.13          | 1.730        | 0.730        | 1.713               | <b>3.145</b>          |
|      | HL-I  | H   | 54  | ASP        | 1.9                    | 11.50            | 11.50             | -0.08           | -0.08          | 0.750        | 1.640        | 0.577               | 0.975                 |
|      | HL-I  | H   | 56  | ASP        | 1.8                    | 18.11            | 18.11             | -0.08           | -0.08          | 0.420        | 0.490        | 1.178               | 1.044                 |
|      | HL-I  | H   | 58  | TYR        | 1.2                    | 48.16            | 48.16             | 0.18            | 0.18           | 0.940        | <b>2.050</b> | 1.664               | 1.114                 |
|      | HL-I  | H   | 95  | ARG        | 0.54                   | 12.49            | 12.49             | -0.12           | -0.12          | 1.850        | 1.480        | -0.036              | -0.271                |
|      | HL-I  | H   | 99  | TYR        | 1.1                    | 87.97            | 87.98             | -0.35           | -0.35          | 1.610        | 1.980        | 1.023               | 1.871                 |

Continued on next page

Table 3 – continued from previous page

| PDB  | Inter | C | Pos  | AA  | $\Delta\Delta G_{exp}$ | ASA <sup>a</sup> | ASA <sup>sc</sup> | d <sup>ad</sup> | d <sup>m</sup> | FoldX        | Robetta      | $\beta_{ACV_{ASA}}$ | $\beta_{ACV_{ASA}^2}$ |
|------|-------|---|------|-----|------------------------|------------------|-------------------|-----------------|----------------|--------------|--------------|---------------------|-----------------------|
|      | HL-I  | H | 100B | HIS | 1.7                    | 49.52            | 49.52             | -0.13           | -0.13          | -            | <b>3.380</b> | 1.685               | <b>2.977</b>          |
|      | HL-I  | I | 47   | LYS | <b>3.6</b>             | 36.96            | 36.96             | -0.08           | -0.08          | <b>2.550</b> | 1.400        | <b>4.665</b>        | <b>4.751</b>          |
|      | HL-I  | I | 48   | ASN | -0.3                   | 0.00             | 0.00              | 2.16            | 2.16           | 0.280        | -            | 0.729               | 0.605                 |
|      | HL-I  | I | 49   | TYR | <b>3.4</b>             | 113.37           | 112.48            | -0.26           | -0.26          | <b>3.520</b> | <b>3.870</b> | <b>3.959</b>        | <b>3.799</b>          |
|      | HL-I  | I | 51   | VAL | 1.9                    | 93.80            | 68.43             | -0.13           | -0.13          | 1.750        | 1.000        | 1.570               | 0.505                 |
|      | HL-I  | I | 52   | LYS | <b>3</b>               | 105.93           | 104.00            | -0.08           | -0.08          | 1.530        | <b>2.380</b> | 1.228               | 0.654                 |
|      | HL-I  | I | 53   | ASN | <b>3.9</b>             | 114.90           | 95.90             | -0.17           | -0.17          | 0.810        | <b>2.720</b> | <b>2.246</b>        | <b>3.766</b>          |
|      | HL-I  | I | 54   | SER | 0.3                    | 21.04            | 14.86             | 0.19            | 2.50           | 0.180        | -0.030       | 0.286               | 0.415                 |
|      | HL-I  | I | 55   | GLU | -0.4                   | 60.34            | 60.28             | -0.23           | 0.08           | 0.250        | -0.100       | -0.320              | -0.618                |
|      | HL-I  | I | 79   | ASN | -0.4                   | 0.00             | 0.00              | 0.63            | 1.99           | 0.230        | -            | 1.887               | 1.956                 |
|      | HL-I  | I | 82   | TRP | <b>4.5</b>             | 45.68            | 45.68             | 0.25            | 0.25           | 1.740        | 1.350        | 1.087               | 1.247                 |
|      | HL-I  | I | 84   | ARG | -0.3                   | 19.08            | 19.08             | 0.60            | 0.60           | 0.650        | 0.370        | 0.217               | 0.600                 |
|      | HL-I  | I | 98   | LYS | 0                      | 64.43            | 64.43             | -0.12           | -0.12          | -0.260       | 0.050        | 0.349               | 0.245                 |
|      | HL-I  | L | 27   | GLU | 0.54                   | 39.52            | 39.52             | 0.48            | 0.48           | 0.040        | 0.670        | 0.588               | 0.549                 |
|      | HL-I  | L | 28   | ASP | 0.44                   | 27.51            | 23.86             | -0.12           | 0.55           | 0.540        | 0.670        | 0.770               | 0.356                 |
|      | HL-I  | L | 30   | TYR | 1.1                    | 67.76            | 67.76             | -0.10           | -0.10          | 0.960        | 1.090        | 1.685               | 1.132                 |
|      | HL-I  | L | 91   | TYR | 0.58                   | 5.32             | 0.06              | 0.18            | 0.28           | 0.260        | 0.280        | 1.072               | 1.659                 |
|      | HL-I  | L | 92   | TRP | <b>2.8</b>             | 114.91           | 90.24             | -0.08           | -0.03          | <b>2.790</b> | <b>3.010</b> | <b>3.398</b>        | <b>3.989</b>          |
|      | HL-I  | L | 93   | SER | -0.65                  | 46.74            | 46.72             | -0.23           | -0.23          | -0.190       | 0.540        | 0.625               | 0.347                 |
|      | HL-I  | L | 94   | THR | 0.38                   | 37.77            | 31.33             | -0.17           | 0.08           | 0.230        | 0.360        | 0.715               | 0.563                 |
|      | HL-I  | L | 96   | TRP | 1.7                    | 2.98             | 2.99              | 0.26            | 0.26           | 0.470        | 0.590        | <b>4.821</b>        | 1.387                 |
| 1JTG | A-B   | A | 104  | GLU | 1.55                   | 98.59            | 94.89             | -0.22           | -0.22          | <b>3.650</b> | <b>2.100</b> | 1.752               | -0.953                |
|      | A-B   | A | 105  | TYR | -0.17                  | 154.63           | 145.98            | -0.27           | -0.27          | <b>3.930</b> | <b>4.490</b> | <b>2.988</b>        | <b>2.601</b>          |
|      | A-B   | A | 130  | SER | 0.33                   | 21.34            | 20.74             | -0.23           | -0.23          | <b>3.020</b> | -0.180       | -0.208              | -1.082                |
|      | A-B   | A | 234  | LYS | 1                      | 0.00             | 0.00              | 0.23            | 0.23           | <b>4.270</b> | 0.600        | <b>4.279</b>        | <b>4.501</b>          |
|      | A-B   | A | 235  | SER | 1.3                    | 4.21             | 3.95              | -0.01           | -0.01          | <b>3.820</b> | <b>2.330</b> | 0.678               | -0.629                |
|      | A-B   | A | 243  | ARG | 1.27                   | 13.40            | 13.40             | -0.30           | -0.30          | <b>3.960</b> | <b>3.760</b> | <b>3.934</b>        | <b>3.485</b>          |
|      | A-B   | B | 49   | ASP | 1.8                    | 138.08           | 115.15            | -0.30           | -0.30          | <b>8.530</b> | <b>6.420</b> | <b>2.355</b>        | <b>3.392</b>          |
|      | A-B   | B | 74   | LYS | <b>3.56</b>            | 26.41            | 26.41             | -0.27           | -0.27          | <b>6.420</b> | 0.680        | <b>6.571</b>        | <b>5.091</b>          |
|      | A-B   | B | 142  | PHE | <b>2.1</b>             | 142.58           | 135.37            | -0.06           | -0.01          | <b>5.350</b> | <b>3.230</b> | <b>2.122</b>        | <b>3.348</b>          |
|      | A-B   | B | 143  | TYR | 0.38                   | 28.88            | 23.82             | -0.11           | -0.09          | <b>4.810</b> | 0.830        | 0.866               | $\surd$               |
| 1NMB | HL-N  | H | 99   | TYR | 1.5                    | 59.68            | 59.69             | -0.01           | -0.01          | 0.320        | 1.280        | -0.238              | 0.821                 |
| 1VFB | AB-C  | A | 30   | HIS | 0.8                    | 28.66            | 28.67             | 0.33            | 0.33           | 0.400        | 0.260        | 0.486               | 0.684                 |
|      | AB-C  | A | 32   | TYR | 1.3                    | 54.48            | 54.49             | 0.14            | 0.14           | <b>2.630</b> | 1.310        | <b>2.206</b>        | 1.466                 |

Continued on next page

Table 3 – continued from previous page

| PDB  | Inter | C | Pos | AA  | $\Delta\Delta G_{exp}$ | ASA <sup>a</sup> | ASA <sup>sc</sup> | d <sup>ad</sup> | d <sup>m</sup> | FoldX        | Robetta      | $\beta_{ACV_{ASA}}$ | $\beta_{ACV^2_{ASA}}$ |
|------|-------|---|-----|-----|------------------------|------------------|-------------------|-----------------|----------------|--------------|--------------|---------------------|-----------------------|
|      | AB-C  | A | 49  | TYR | 0.8                    | 21.06            | 21.06             | 0.38            | 0.38           | 0.610        | 0.490        | 1.022               | 1.417                 |
|      | AB-C  | A | 50  | TYR | 0.4                    | 66.18            | 66.18             | -0.06           | -0.06          | <b>2.610</b> | 1.520        | 1.760               | <b>4.406</b>          |
|      | AB-C  | A | 53  | THR | -0.23                  | 17.71            | 17.71             | -0.25           | -0.25          | 1.170        | 0.640        | 0.538               | 0.558                 |
|      | AB-C  | A | 92  | TRP | 1.71                   | 60.86            | 60.86             | 0.15            | 0.15           | <b>3.290</b> | <b>2.060</b> | 1.965               | -1.066                |
|      | AB-C  | A | 93  | SER | 0.11                   | 42.22            | 35.45             | -0.16           | 0.63           | 0.050        | 0.000        | 0.487               | 0.672                 |
|      | AB-C  | B | 32  | TYR | 0.5                    | 30.94            | 30.52             | 0.37            | 0.37           | 0.510        | 0.660        | 0.917               | <b>2.080</b>          |
|      | AB-C  | B | 52  | TRP | 1.23                   | 53.78            | 53.78             | -0.12           | -0.12          | 1.520        | 1.750        | <b>2.530</b>        | <b>2.592</b>          |
|      | AB-C  | B | 54  | ASP | 1.95                   | 36.05            | 32.45             | 0.29            | 0.29           | -0.500       | -0.140       | 0.598               | 1.140                 |
|      | AB-C  | B | 58  | ASP | -0.2                   | 0.00             | 0.00              | 2.98            | 2.98           | 0.040        | -            | 0.540               | 0.887                 |
|      | AB-C  | B | 99  | ARG | 0.47                   | 48.98            | 48.98             | -0.37           | -0.37          | -0.100       | 0.730        | 1.640               | <b>2.829</b>          |
|      | AB-C  | B | 100 | ASP | <b>3.1</b>             | 61.62            | 60.34             | -0.14           | -0.14          | <b>2.600</b> | <b>3.030</b> | <b>3.747</b>        | <b>4.773</b>          |
|      | AB-C  | B | 101 | TYR | <b>4</b>               | 68.40            | 68.40             | -0.13           | -0.13          | <b>4.890</b> | <b>3.230</b> | <b>2.997</b>        | <b>6.263</b>          |
|      | AB-C  | C | 18  | ASP | 0.3                    | 32.14            | 31.89             | -0.06           | -0.06          | <b>2.310</b> | 0.550        | 0.704               | 0.406                 |
|      | AB-C  | C | 19  | ASN | 0.3                    | 69.81            | 69.81             | -0.25           | -0.25          | 1.130        | 1.000        | 1.924               | 1.396                 |
|      | AB-C  | C | 23  | TYR | 0.4                    | 9.27             | 9.27              | 0.23            | 1.41           | 0.660        | -            | 0.008               | ∇                     |
|      | AB-C  | C | 24  | SER | 0.8                    | 43.53            | 41.63             | -0.14           | 0.04           | 0.540        | 0.710        | 1.088               | 0.866                 |
|      | AB-C  | C | 116 | LYS | 0.7                    | 61.49            | 52.60             | 0.31            | 0.31           | 0.680        | 0.850        | 1.225               | 0.575                 |
|      | AB-C  | C | 118 | THR | 0.8                    | 44.15            | 33.90             | 0.04            | 0.29           | 0.900        | 0.100        | 0.567               | 0.816                 |
|      | AB-C  | C | 119 | ASP | <b>1</b>               | 44.87            | 40.94             | -0.12           | -0.10          | 1.570        | 1.670        | 1.505               | 1.386                 |
|      | AB-C  | C | 120 | VAL | 0.9                    | 13.75            | 13.27             | 0.12            | 0.12           | 1.370        | 0.230        | 1.630               | <b>6.105</b>          |
|      | AB-C  | C | 121 | GLN | <b>2.9</b>             | 120.40           | 119.81            | -0.23           | -0.23          | <b>5.330</b> | <b>4.200</b> | <b>3.120</b>        | <b>2.683</b>          |
|      | AB-C  | C | 124 | ILE | 1.2                    | 22.89            | 21.77             | 0.49            | 0.49           | 1.580        | -            | 1.203               | 1.759                 |
|      | AB-C  | C | 125 | ARG | 1.8                    | 56.47            | 56.47             | 0.12            | 0.12           | <b>2.450</b> | <b>2.220</b> | 0.608               | 1.174                 |
|      | AB-C  | C | 129 | LEU | 0.2                    | 28.38            | 0.00              | 0.33            | 0.33           | 0.840        | -            | 0.081               | ∇                     |
| 2PTC | E-I   | I | 15  | LYS | <b>10.05</b>           | 201.11           | 165.20            | -0.48           | 0.06           | 1.560        | <b>4.160</b> | <b>4.115</b>        | <b>2.994</b>          |
|      | E-I   | I | 18  | ILE | <b>4.97</b>            | 56.56            | 56.56             | 0.54            | 0.54           | 1.510        | 0.940        | 1.260               | <b>2.177</b>          |
| 3HFM | HL-Y  | H | 31  | SER | 0.18                   | 40.97            | 40.12             | -0.59           | -0.59          | -0.140       | 0.380        | 0.795               | 0.572                 |
|      | HL-Y  | H | 32  | ASP | 1.93                   | 36.26            | 31.97             | 0.49            | 0.71           | 0.610        | 1.100        | 0.462               | 0.833                 |
|      | HL-Y  | H | 33  | TYR | <b>6</b>               | 74.92            | 74.92             | -0.05           | -0.05          | <b>2.770</b> | <b>2.900</b> | <b>3.916</b>        | <b>7.609</b>          |
|      | HL-Y  | H | 50  | TYR | <b>7.4</b>             | 16.75            | 16.75             | -0.54           | -0.54          | 0.460        | <b>2.960</b> | <b>5.108</b>        | <b>3.166</b>          |
|      | HL-Y  | H | 53  | TYR | <b>3.3</b>             | 91.75            | 89.66             | -0.49           | -0.26          | 1.510        | 1.660        | <b>2.160</b>        | <b>4.738</b>          |
|      | HL-Y  | H | 58  | TYR | 1.7                    | 45.89            | 45.89             | -0.50           | -0.50          | -0.630       | 1.770        | 1.195               | <b>3.219</b>          |
|      | HL-Y  | H | 98  | TRP | <b>5.5</b>             | 52.02            | 52.02             | 0.12            | 0.12           | 0.870        | 0.990        | <b>3.252</b>        | <b>4.288</b>          |
|      | HL-Y  | L | 31  | ASN | <b>5.2</b>             | 53.35            | 53.35             | -0.20           | -0.16          | 1.450        | 1.860        | 1.159               | 1.470                 |

Continued on next page



Table 3 – continued from previous page

| PDB  | Inter | C | Pos | AA  | $\Delta\Delta G_{exp}$ | ASA <sup>a</sup> | ASA <sup>sc</sup> | d <sup>ad</sup> | d <sup>m</sup> | FoldX  | Robetta      | $\beta_{ACV_{ASA}}$ | $\beta_{ACV_{ASA}^2}$ |
|------|-------|---|-----|-----|------------------------|------------------|-------------------|-----------------|----------------|--------|--------------|---------------------|-----------------------|
|      | HL-Y  | L | 32  | ASN | <b>5.13</b>            | 29.83            | 29.83             | 0.19            | 0.19           | 1.320  | <b>2.480</b> | <b>3.055</b>        | <b>3.477</b>          |
|      | HL-Y  | L | 50  | TYR | <b>4.6</b>             | 57.84            | 57.84             | -0.39           | -0.39          | 1.090  | 1.400        | <b>2.913</b>        | -1.497                |
|      | HL-Y  | L | 53  | GLN | 0.96                   | 53.23            | 53.23             | -0.45           | -0.45          | 1.640  | 0.830        | 1.079               | 0.828                 |
|      | HL-Y  | L | 96  | TYR | <b>2.73</b>            | 16.30            | 16.31             | -0.16           | -0.16          | -0.730 | 0.450        | <b>3.018</b>        | <b>2.763</b>          |
|      | HL-Y  | Y | 15  | HIS | -0.44                  | 16.36            | 12.91             | -0.09           | 0.98           | -      | 0.100        | -0.195              | -0.039                |
|      | HL-Y  | Y | 20  | TYR | <b>4.9</b>             | 66.59            | 66.59             | 0.02            | 0.02           | 0.800  | <b>2.230</b> | <b>3.631</b>        | <b>8.701</b>          |
|      | HL-Y  | Y | 21  | ARG | 1.07                   | 121.93           | 118.40            | -0.54           | -0.54          | -0.790 | <b>3.420</b> | <b>2.229</b>        | 1.363                 |
|      | HL-Y  | Y | 63  | TRP | 0.31                   | 22.90            | 22.90             | -0.17           | -0.17          | 1.190  | 0.830        | 1.938               | 0.828                 |
|      | HL-Y  | Y | 73  | ARG | -0.33                  | 67.88            | 67.88             | -0.60           | -0.60          | -0.460 | 0.620        | 0.886               | 0.594                 |
|      | HL-Y  | Y | 75  | LEU | 0.69                   | 61.94            | 58.98             | -0.06           | -0.06          | 1.140  | 1.310        | 1.829               | 1.060                 |
|      | HL-Y  | Y | 89  | THR | 0                      | 15.37            | 15.37             | 0.36            | 0.36           | 0.300  | 0.170        | 0.009               | 0.268                 |
|      | HL-Y  | Y | 93  | ASN | 0.21                   | 48.27            | 44.04             | -0.45           | -0.45          | 1.650  | 1.530        | 1.045               | 0.988                 |
|      | HL-Y  | Y | 96  | LYS | <b>7</b>               | 53.30            | 51.52             | -0.39           | -0.39          | 1.200  | <b>2.130</b> | <b>3.384</b>        | <b>4.369</b>          |
|      | HL-Y  | Y | 97  | LYS | <b>6.2</b>             | 77.64            | 72.16             | -0.05           | 0.14           | 0.910  | 1.420        | 1.359               | 1.244                 |
|      | HL-Y  | Y | 98  | ILE | 0                      | 2.53             | 2.10              | 0.20            | 1.59           | 0.080  | -            | 0.843               | 0.531                 |
|      | HL-Y  | Y | 100 | SER | 0.26                   | 41.61            | 23.24             | 0.01            | 0.16           | -0.150 | 0.840        | <b>2.056</b>        | 1.886                 |
|      | HL-Y  | Y | 101 | ASP | 0.94                   | 93.94            | 84.66             | -0.49           | -0.49          | 0.070  | 0.320        | <b>2.788</b>        | <b>2.799</b>          |
| 3HHR | A-BC  | A | 2   | PRO | -0.05                  | 86.40            | 75.92             | 0.09            | 0.09           | 1.420  | -            | 0.160               | 0.135                 |
|      | A-BC  | A | 3   | THR | -0.05                  | 4.59             | 0.77              | 1.72            | 3.16           | -      | 0.010        | -0.211              | -0.476                |
|      | A-BC  | A | 4   | ILE | 0.41                   | 69.54            | 68.36             | 0.40            | 0.40           | 0.330  | 1.050        | 0.699               | 0.103                 |
|      | A-BC  | A | 5   | PRO | 0.43                   | 0.00             | 0.00              | 2.86            | 2.86           | -      | -            | 0.255               | 0.400                 |
|      | A-BC  | A | 8   | ARG | 0.2                    | 88.45            | 88.45             | 0.14            | 0.14           | -2.140 | 1.360        | 1.030               | 1.384                 |
|      | A-BC  | A | 9   | LEU | -0.04                  | 18.77            | 14.72             | -0.02           | -0.02          | 0.320  | 0.440        | 1.031               | 1.934                 |
|      | A-BC  | A | 12  | ASN | 0.1                    | 59.83            | 59.14             | -0.33           | -0.33          | 0.020  | <b>3.020</b> | <b>2.881</b>        | 1.872                 |
|      | A-BC  | A | 15  | LEU | 0.15                   | 75.00            | 70.45             | -0.19           | 0.18           | 0.280  | 1.260        | 1.429               | 0.918                 |
|      | A-BC  | A | 16  | ARG | 0.24                   | 80.77            | 80.77             | -0.21           | -0.21          | 0.960  | <b>2.780</b> | <b>3.592</b>        | <b>4.375</b>          |
|      | A-BC  | A | 19  | ARG | 0.05                   | 44.37            | 44.37             | 0.74            | 1.02           | 0.120  | 0.230        | -0.059              | -0.670                |
|      | A-BC  | B | 108 | CYS | 0                      | 9.97             | 9.97              | 0.47            | 0.47           | 0.130  | -0.040       | 1.002               | 0.941                 |
|      | A-BC  | B | 122 | CYS | 0                      | 71.60            | 37.92             | -0.09           | 1.08           | 0.210  | -0.200       | 1.341               | 1.774                 |
|      | A-BC  | B | 173 | GLU | 0.08                   | 0.00             | 0.00              | 2.84            | 2.84           | -      | -            | -0.139              | 0.068                 |

Table 4: Eight atomic types.

| Short Name | Atomic names                                                                                                                                                                                                                                                                                                                                                                                                     |
|------------|------------------------------------------------------------------------------------------------------------------------------------------------------------------------------------------------------------------------------------------------------------------------------------------------------------------------------------------------------------------------------------------------------------------|
| N.H+       | ILE_N_ VAL_N_ LEU_N_ PHE_N_ CYS_N_ MET_N_ ALA_N_<br>GLY_N_ THR_N_ SER_N_ TRP_N_ TYR_N_ HIS_N_ GLU_N_<br>GLN_N_ ASP_N_ ASN_N_ LYS_N_ ARG_N_ ARG_NE_ ARG_NH1<br>ASN_ND2 GLN_NE2 HIS_NE2 TRP_NE1                                                                                                                                                                                                                    |
| N+H+       | ARG_NH2 LYS_NZ_                                                                                                                                                                                                                                                                                                                                                                                                  |
| O.H0       | ILE_O_ VAL_O_ LEU_O_ PHE_O_ CYS_O_ MET_O_ ALA_O_<br>GLY_O_ THR_O_ SER_O_ TRP_O_ TYR_O_ PRO_O_ HIS_O_<br>GLU_O_ GLN_O_ ASP_O_ ASN_O_ LYS_O_ ARG_O_ ASP_OD1<br>GLU_OE1 ASN_OD1 GLN_OE1 PRO_N_ HIS_ND1                                                                                                                                                                                                              |
| O-H0       | ASP_OD2 GLU_OE2 ILE_OXT VAL_OXT LEU_OXT PHE_OXT<br>CYS_OXT MET_OXT ALA_OXT GLY_OXT THR_OXT SER_OXT<br>TRP_OXT TYR_OXT PRO_OXT HIS_OXT GLU_OXT GLN_OXT<br>ASP_OXT ASN_OXT LYS_OXT ARG_OXT                                                                                                                                                                                                                         |
| O.H+       | SER_OG_ THR_OG1 TYR_OH_ HOH_O_                                                                                                                                                                                                                                                                                                                                                                                   |
| C.NO       | ILE_C_ VAL_C_ LEU_C_ PHE_C_ CYS_C_ MET_C_ ALA_C_<br>GLY_C_ THR_C_ SER_C_ TRP_C_ TYR_C_ PRO_C_ HIS_C_<br>GLU_C_ GLN_C_ ASP_C_ ASN_C_ LYS_C_ ARG_C_ ILE_CA_<br>VAL_CA_ LEU_CA_ PHE_CA_ CYS_CA_ MET_CA_ ALA_CA_ GLY_CA_<br>THR_CA_ SER_CA_ TRP_CA_ TYR_CA_ PRO_CA_ HIS_CA_ GLU_CA_<br>GLN_CA_ ASP_CA_ ASN_CA_ LYS_CA_ ARG_CA_ ARG_CZ_ ARG_CD_<br>LYS_CE_ PRO_CD_ ASP_CG_ GLU_CD_ SER_CB_ THR_CB_ ASN_CG_<br>GLN_CD_ |
| C.NON      | MET_SD_ CYS_SG_ LEU_CG_ ILE_CB_ VAL_CB_ LEU_CB_ PHE_CB_<br>CYS_CB_ MET_CB_ ALA_CB_ TRP_CB_ TYR_CB_ PRO_CB_ HIS_CB_<br>GLU_CB_ GLN_CB_ ASP_CB_ ASN_CB_ LYS_CB_ ARG_CB_ ARG_CG_<br>GLU_CG_ GLN_CG_ LYS_CG_ LYS_CD_ PRO_CG_ ILE_CG1 MET_CG_<br>MET_CE_ ILE_CD1 THR_CG2 ILE_CG2 LEU_CD1 LEU_CD2 VAL_CG1<br>VAL_CG2                                                                                                   |
| ARC        | HIS_CD2 HIS_CE1 HIS_CG_ PHE_CG_ PHE_CD1 PHE_CD2 PHE_CE1<br>PHE_CE2 PHE_CZ_ TRP_CD1 TRP_CE2 TRP_CH2 TRP_CE3 TRP_CZ3<br>TRP_CG_ TRP_CD2 TRP_CZ2 TYR_CZ_ TYR_CG_ TYR_CD1 TYR_CD2<br>TYR_CE1 TYR_CE2                                                                                                                                                                                                                 |

'H+': more than one hydrogen

'H0': without any hydrogens

'N/O\_': nitrogen/oxygen atoms without charged

'N+': nitrogen atoms with positively charged

'O-': oxygen atoms with negatively charged

'C\_NO(N)': carbon atoms with(out) covalent-bond nitrogen or oxygen

'ARC': carbon atoms in an aromatic ring

For 'XXXYYZZ' or 'XXX.YZZ' or 'XXX.YZ\_' in the second column, XXX represents a residue type, and \_Y or YY denotes an atomic name, while Z or Z\_ indicates a specific position of \_Y or YY in XXX.

## References

1. Fischer TB, Arunachalam KV, Bailey D, Mangual V, Bakhru S, Russo R, Huang D, Paczkowski M, Lalchandani V, Ramachandra C, Ellison B, Galer S, Shapley J, Fuentes E, Tsai J: **The binding interface database (BID): a compilation of amino acid hot spots in protein interfaces.** *Bioinformatics* 2003, **19**(11):1453–1454.
2. Hopf M, Gohring W, Ries A, Timpl R, Hohenester E: **Crystal structure and mutational analysis of a perlecan-binding fragment of nidogen-1.** *Nature structural biology* 2001, **8**(7):634–640.
3. Hubbard SJ, Thornton JM: **'NACCESS', computer program.** Tech. rep., Department of Biochemistry Molecular Biology, University College London 1993.
